# Supplementary material for: Efficient catalytic upcycling of polyester and polycarbonate plastics using NNN-based iron catalyst
Source: Research Square preprint supplement (doi:10.21203/rs.3.rs-5750869/v1), 2025-04-24

## checkCIF/PLATON report

Structure factors have been supplied for datablock(s) ov\_pmf\_auto

THIS REPORT IS FOR GUIDANCE ONLY. IF USED AS PART OF A REVIEW PROCEDURE FOR PUBLICATION, IT SHOULD NOT REPLACE THE EXPERTISE OF AN EXPERIENCED CRYSTALLOGRAPHIC REFEREE.

No syntax errors found.      CIF dictionary      Interpreting this report

### Datablock: ov\_pmf\_auto

---

|                 |                                    |                                        |              |
|-----------------|------------------------------------|----------------------------------------|--------------|
| Bond precision: | C-C = 0.0108 A                     | Wavelength=1.54184                     |              |
| Cell:           | a=41.6176(10)                      | b=10.7884(2)                           | c=22.8010(6) |
|                 | alpha=90                           | beta=99.547(2)                         | gamma=90     |
| Temperature:    | 298 K                              |                                        |              |
|                 | Calculated                         | Reported                               |              |
| Volume          | 10095.6(4)                         | 10095.6(4)                             |              |
| Space group     | C 2/c                              | C 1 2/c 1                              |              |
| Hall group      | -C 2yc                             | -C 2yc                                 |              |
| Moiety formula  | 3(C24 H26 Cl4 Fe2 N6), 5(C H2 Cl2) | 1.5(C24 H26 Cl4 Fe2 N6), 2.5(C H2 Cl2) |              |
| Sum formula     | C77 H88 Cl22 Fe6 N18               | C38.50 H44 Cl11 Fe3 N9                 |              |
| Mr              | 2380.66                            | 1190.32                                |              |
| Dx, g cm-3      | 1.566                              | 1.566                                  |              |
| Z               | 4                                  | 8                                      |              |
| Mu (mm-1)       | 12.496                             | 12.496                                 |              |
| F000            | 4824.0                             | 4824.0                                 |              |
| F000'           | 4837.90                            |                                        |              |
| h,k,lmax        | 52,13,28                           | 52,13,28                               |              |
| Nref            | 10624                              | 10116                                  |              |
| Tmin,Tmax       | 0.156,0.287                        | 0.189,0.368                            |              |
| Tmin'           | 0.043                              |                                        |              |

Correction method= # Reported T Limits: Tmin=0.189 Tmax=0.368  
AbsCorr = MULTI-SCAN

Data completeness= 0.952      Theta(max)= 76.545

R(reflections)= 0.0696( 6413)

wR2(reflections)=  
0.2304( 10116)

S = 1.039

Npar= 636

---

The following ALERTS were generated. Each ALERT has the format

**test-name\_ALERT\_alert-type\_alert-level.**

Click on the hyperlinks for more details of the test.

---

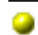

### Alert level C

ABSTY02\_ALERT\_1\_C An \_exptl\_absorpt\_correction\_type has been given without a literature citation. This should be contained in the \_exptl\_absorpt\_process\_details field.

Absorption correction given as multi-scan

PLAT041\_ALERT\_1\_C Calc. and Reported SumFormula Strings Differ Please Check  
Calc: C77 H88 Cl22 Fe6 N18  
Rep.: C38.50 H44 Cl11 Fe3 N9

PLAT042\_ALERT\_1\_C Calc. and Reported MoietyFormula Strings Differ Please Check  
Calc: 3(C24 H26 Cl4 Fe2 N6), 5(C H2 Cl2)  
Rep.: 1.5(C24 H26 Cl4 Fe2 N6), 2.5(C H2 Cl2)

PLAT234\_ALERT\_4\_C Large Hirshfeld Difference C26 --C27 . 0.19 Ang.

PLAT234\_ALERT\_4\_C Large Hirshfeld Difference C31 --C42 . 0.23 Ang.

PLAT241\_ALERT\_2\_C High 'MainMol' Ueq as Compared to Neighbors of C7 Check

PLAT241\_ALERT\_2\_C High 'MainMol' Ueq as Compared to Neighbors of C31 Check

PLAT242\_ALERT\_2\_C Low 'MainMol' Ueq as Compared to Neighbors of Fe03 Check

PLAT243\_ALERT\_4\_C High 'Solvent' Ueq as Compared to Neighbors of C18 Check

PLAT244\_ALERT\_4\_C Low 'Solvent' Ueq as Compared to Neighbors of C37 Check

PLAT260\_ALERT\_2\_C Large Average Ueq of Residue Including C18 0.197 Check

PLAT260\_ALERT\_2\_C Large Average Ueq of Residue Including C11 0.169 Check

PLAT260\_ALERT\_2\_C Large Average Ueq of Residue Including C17 0.157 Check

PLAT341\_ALERT\_3\_C Low Bond Precision on C-C Bonds ..... 0.01075 Ang.

PLAT420\_ALERT\_2\_C D-H Bond Without Acceptor N7 --H7 . Please Check

PLAT906\_ALERT\_3\_C Large K Value in the Analysis of Variance ..... 2.562 Check

PLAT911\_ALERT\_3\_C Missing FCF Refl Between Thmin & STh/L= 0.600 43 Report

16 12 0, 35 9 0, -35 9 1, -16 12 1, -14 12 1, -35 9 2,  
-14 12 2, -14 12 3, 19 3 3, 21 3 3, 18 4 4, -38 8 6,  
-38 8 7, -36 8 7, 4 12 7, -34 8 8, -30 10 8, -28 10 8,  
42 4 8, -30 8 9, -28 10 9, -26 10 9, -28 10 10, 40 4 10,  
3 11 11, 3 11 12, -44 4 13, -9 11 14, 31 5 14, 32 4 14,  
-32 8 15, -30 8 15, -27 9 15, 32 4 15, 35 3 15, 29 5 16,  
34 2 16, -10 10 17, 30 4 17, -13 7 22, -11 7 22, 7 5 23,  
5 5 24,

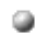

### Alert level G

PLAT002\_ALERT\_2\_G Number of Distance or Angle Restraints on AtSite 5 Note

PLAT003\_ALERT\_2\_G Number of Uiso or U(i,j) Restrained non-H-Atoms 18 Report

PLAT007\_ALERT\_5\_G Number of Unrefined Donor-H Atoms ..... 3 Report  
H1 H4 H7

PLAT045\_ALERT\_1\_G Calculated and Reported Z Differ by a Factor ... 0.500 Check

PLAT072\_ALERT\_2\_G SHELXL First Parameter in WGHT Unusually Large 0.13 Report

PLAT083\_ALERT\_2\_G SHELXL Second Parameter in WGHT Unusually Large 15.84 Why ?

PLAT176\_ALERT\_4\_G The CIF-Embedded .res File Contains SADI Records 3 Report

PLAT177\_ALERT\_4\_G The CIF-Embedded .res File Contains DELU Records 1 Report

PLAT178\_ALERT\_4\_G The CIF-Embedded .res File Contains SIMU Records 3 Report

PLAT186\_ALERT\_4\_G The CIF-Embedded .res File Contains ISOR Records 3 Report

PLAT187\_ALERT\_4\_G The CIF-Embedded .res File Contains RIGU Records 7 Report

PLAT188\_ALERT\_3\_G A Non-default SIMU Restraint Value has been used 0.0200 Report

PLAT188\_ALERT\_3\_G A Non-default SIMU Restraint Value has been used 0.0100 Report

PLAT190\_ALERT\_3\_G A Non-default RIGU Restraint Value for First Par 0.0010 Report

|                   |                                                  |        |        |
|-------------------|--------------------------------------------------|--------|--------|
| PLAT190_ALERT_3_G | A Non-default RIGU Restraint Value for SecondPar | 0.0020 | Report |
| PLAT190_ALERT_3_G | A Non-default RIGU Restraint Value for First Par | 0.0010 | Report |
| PLAT190_ALERT_3_G | A Non-default RIGU Restraint Value for SecondPar | 0.0020 | Report |
| PLAT190_ALERT_3_G | A Non-default RIGU Restraint Value for First Par | 0.0010 | Report |
| PLAT190_ALERT_3_G | A Non-default RIGU Restraint Value for SecondPar | 0.0020 | Report |
| PLAT190_ALERT_3_G | A Non-default RIGU Restraint Value for First Par | 0.0010 | Report |
| PLAT190_ALERT_3_G | A Non-default RIGU Restraint Value for SecondPar | 0.0020 | Report |
| PLAT190_ALERT_3_G | A Non-default RIGU Restraint Value for First Par | 0.0010 | Report |
| PLAT190_ALERT_3_G | A Non-default RIGU Restraint Value for SecondPar | 0.0020 | Report |
| PLAT190_ALERT_3_G | A Non-default RIGU Restraint Value for First Par | 0.0010 | Report |
| PLAT190_ALERT_3_G | A Non-default RIGU Restraint Value for SecondPar | 0.0020 | Report |
| PLAT191_ALERT_3_G | A Non-default SADI Restraint Value has been used | 0.0400 | Report |
| PLAT230_ALERT_2_G | Hirshfeld Test Diff for C7 --C46 .               | 9.1    | s.u.   |
| PLAT230_ALERT_2_G | Hirshfeld Test Diff for C7 --C8 .                | 5.2    | s.u.   |
| PLAT230_ALERT_2_G | Hirshfeld Test Diff for C31 --C32 .              | 5.1    | s.u.   |
| PLAT299_ALERT_4_G | Atom Site Occupancy Constrained at .....         | 0.5    | Check  |
|                   | H38A H38B                                        |        |        |
| PLAT301_ALERT_3_G | Main Residue Disorder .....(Resd 1)              | 33%    | Note   |
| PLAT301_ALERT_3_G | Main Residue Disorder .....(Resd 2)              | 17%    | Note   |
| PLAT302_ALERT_4_G | Anion/Solvent/Minor-Residue Disorder (Resd 3)    | 67%    | Note   |
| PLAT410_ALERT_2_G | Short Intra H...H Contact H7BC ..H6B .           | 2.11   | Ang.   |
|                   | x,y,z =                                          | 1_555  | Check  |
| PLAT410_ALERT_2_G | Short Intra H...H Contact H6B ..H7AB .           | 2.10   | Ang.   |
|                   | x,y,z =                                          | 1_555  | Check  |
| PLAT410_ALERT_2_G | Short Intra H...H Contact H30A ..H31A .          | 2.14   | Ang.   |
|                   | x,y,z =                                          | 1_555  | Check  |
| PLAT410_ALERT_2_G | Short Intra H...H Contact H30A ..H31D .          | 2.12   | Ang.   |
|                   | x,y,z =                                          | 1_555  | Check  |
| PLAT414_ALERT_2_G | Short Intra D-H..H-X H1 ..H7BD .                 | 2.05   | Ang.   |
|                   | x,y,z =                                          | 1_555  | Check  |
| PLAT414_ALERT_2_G | Short Intra D-H..H-X H1 ..H7AA .                 | 2.04   | Ang.   |
|                   | x,y,z =                                          | 1_555  | Check  |
| PLAT414_ALERT_2_G | Short Intra D-H..H-X H7 ..H31B .                 | 2.09   | Ang.   |
|                   | x,y,z =                                          | 1_555  | Check  |
| PLAT414_ALERT_2_G | Short Intra D-H..H-X H7 ..H31C .                 | 2.07   | Ang.   |
|                   | x,y,z =                                          | 1_555  | Check  |
| PLAT434_ALERT_2_G | Short Inter HL..HL Contact Cl2 ..Cl2 .           | 3.27   | Ang.   |
|                   | 3/2-x,-1/2-y,1-z =                               | 7_646  | Check  |
| PLAT720_ALERT_4_G | Number of Unusual/Non-Standard Labels .....      | 13     | Note   |
|                   | Fe01 Fe02 Fe03 H7BC H7BD H7AA H7AB N0            |        |        |
|                   | CO H0 C01R H01A H01B                             |        |        |
| PLAT721_ALERT_1_G | Bond Calc 0.96000, Rep 0.97000 Dev...            | 0.01   | Ang.   |
|                   | C39 -H39A 1_555 1_555 .....                      | # 124  | Check  |
| PLAT722_ALERT_1_G | Angle Calc 107.00, Rep 108.10 Dev...             | 1.10   | Degree |
|                   | CL10 -C39 -H39B 1_555 1_555 1_555                | # 248  | Check  |
| PLAT793_ALERT_4_G | Model has Chirality at N1 (Centro SpGr)          | R      | Verify |
| PLAT793_ALERT_4_G | Model has Chirality at N4 (Centro SpGr)          | R      | Verify |
| PLAT793_ALERT_4_G | Model has Chirality at N7 (Centro SpGr)          | S      | Verify |
| PLAT794_ALERT_5_G | Tentative Bond Valency for Fe01 (II) .           | 1.91   | Info   |
| PLAT860_ALERT_3_G | Number of Least-Squares Restraints .....         | 350    | Note   |
| PLAT910_ALERT_3_G | Missing # of FCF Reflection(s) Below Theta(Min). | 1      | Note   |
|                   | 2 0 0,                                           |        |        |
| PLAT912_ALERT_4_G | Missing # of FCF Reflections Above STh/L= 0.600  | 464    | Note   |
| PLAT941_ALERT_3_G | Average HKL Measurement Multiplicity .....       | 3.4    | Low    |
| PLAT969_ALERT_5_G | The 'Henn et al.' R-Factor-gap value .....       | 4.640  | Note   |

Predicted wR2: Based on SigI\*\*2 4.97 or SHELX Weight 22.18  
PLAT978\_ALERT\_2\_G Number C-C Bonds with Positive Residual Density. 1 Info

---

0 **ALERT level A** = Most likely a serious problem - resolve or explain  
0 **ALERT level B** = A potentially serious problem, consider carefully  
17 **ALERT level C** = Check. Ensure it is not caused by an omission or oversight  
57 **ALERT level G** = General information/check it is not something unexpected

6 ALERT type 1 CIF construction/syntax error, inconsistent or missing data  
24 ALERT type 2 Indicator that the structure model may be wrong or deficient  
25 ALERT type 3 Indicator that the structure quality may be low  
16 ALERT type 4 Improvement, methodology, query or suggestion  
3 ALERT type 5 Informative message, check

---

It is advisable to attempt to resolve as many as possible of the alerts in all categories. Often the minor alerts point to easily fixed oversights, errors and omissions in your CIF or refinement strategy, so attention to these fine details can be worthwhile. In order to resolve some of the more serious problems it may be necessary to carry out additional measurements or structure refinements. However, the purpose of your study may justify the reported deviations and the more serious of these should normally be commented upon in the discussion or experimental section of a paper or in the "special\_details" fields of the CIF. checkCIF was carefully designed to identify outliers and unusual parameters, but every test has its limitations and alerts that are not important in a particular case may appear. Conversely, the absence of alerts does not guarantee there are no aspects of the results needing attention. It is up to the individual to critically assess their own results and, if necessary, seek expert advice.

### Publication of your CIF in IUCr journals

A basic structural check has been run on your CIF. These basic checks will be run on all CIFs submitted for publication in IUCr journals (*Acta Crystallographica*, *Journal of Applied Crystallography*, *Journal of Synchrotron Radiation*); however, if you intend to submit to *Acta Crystallographica Section C* or *E* or *IUCrData*, you should make sure that full publication checks are run on the final version of your CIF prior to submission.

### Publication of your CIF in other journals

Please refer to the *Notes for Authors* of the relevant journal for any special instructions relating to CIF submission.

Datablock ov\_pmf\_auto - ellipsoid plot

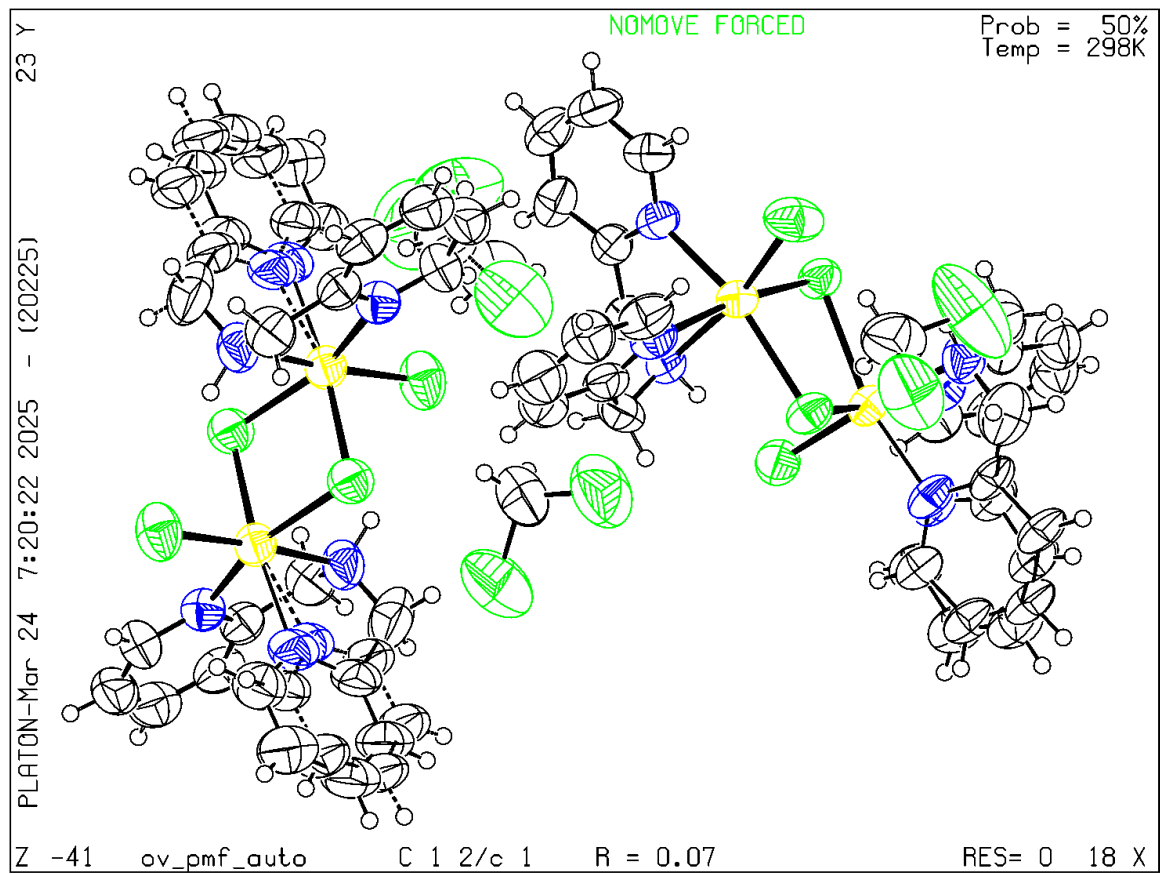

Supplement: Supplementary file 2 [file fc04f324c0517e9715afd935.pdf]
