# Supplementary material for: Efficient catalytic upcycling of polyester and polycarbonate plastics using NNN-based iron catalyst
Source: Research Square preprint supplement (doi:10.21203/rs.3.rs-5750869/v1), 2025-04-24
Supplement: Supplementary file 1 [file f94b10cc16b50b0d19851318.pdf]

## **Supplementary Information**

### **Efficient catalytic upcycling of polyester and polycarbonate plastics using NNN-based iron catalyst**

**Chu et al.**

## Table of contents

|                                                                                                                                 |   |
|---------------------------------------------------------------------------------------------------------------------------------|---|
| 1. General information .....                                                                                                    | 3 |
| 2. Synthesis of the catalyst.....                                                                                               | 3 |
| 3. General procedure for transfer hydrogenation of esters .....                                                                 | 3 |
| 4. General procedure for catalytic methanolysis/hydrogenative depolymerization of polyester<br>and polycarbonate plastics ..... | 3 |
| 5. General procedure for autoclave reactions .....                                                                              | 4 |
| 6. Characterization data for hydrogenation products .....                                                                       | 4 |
| 7. NMR spectra of the products .....                                                                                            | 9 |

## 1. General information

All manipulations were done under a N<sub>2</sub> atmosphere using standard Schlenk line techniques or in a glovebox, unless otherwise stated. The reaction gas hydrogen (5.0) was supplied by Feiyuan and used without further purification. All reagents were purchased from Sigma-Aldrich, TCI or Acros and used without further purification. Methanol, toluene, and THF, were purified using a Glass Contour solvent purification system consisting of a neutral alumina, copper catalyst, and activated molecular sieves, then passed through an in-line, 2 µm filter immediately before being dispensed. CDCl<sub>3</sub> were dried over CaH<sub>2</sub> and purified by vacuum transfer. NMR spectra were recorded on Bruker Avance 500 spectrometer in NMR tubes at room temperature. <sup>1</sup>H and <sup>13</sup>C NMR chemical shifts are referenced to the proton signal of the deuterated solvent. MS (HRMS) measured with ThermoFisher Q-Exactive Mass Spectrometer.

## 2. Synthesis of the catalyst

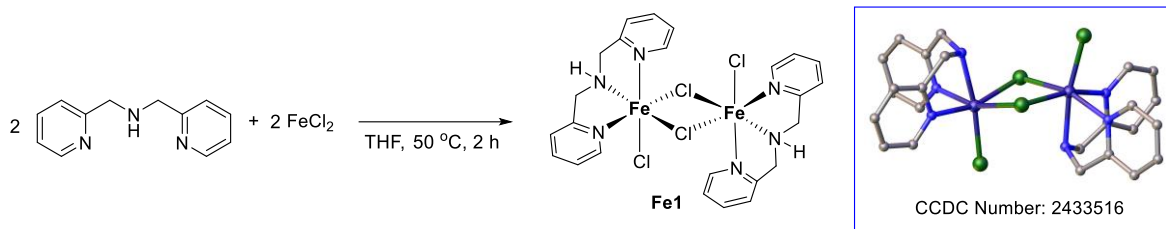

Bis(pyridin-2-ylmethyl)amine (199 mg, 1 mmol) and FeCl<sub>2</sub> (125 mg, 1 mmol) were added to a Schlenk bottle with 20 mL THF. The mixture was heated to 50 °C and stirred for 2 hours. Then, the suspension was recrystallized at -30 °C and yellow microcrystals were obtained (267 mg, 82% yield).

## 3. General procedure for transfer hydrogenation of esters

In a glovebox under an N<sub>2</sub> atmosphere, a scintillation vial (with a magnetic stir bar) was charged with esters (1.0 mmol), and H<sub>3</sub>N·BH<sub>3</sub> (1.0 mmol, 31 mg). The catalyst **Fe1** (0.02 mmol, 7 mg), KO<sup>t</sup>Bu (0.05 mmol, 6 mg), and THF (2 mL) were added. The mixture was stirred at 60 °C. After the indicated time, the reaction mixture was isolated by chromatography on silica gel to give the product.

## 4. General procedure for catalytic methanolysis/hydrogenative depolymerization of polyester and polycarbonate plastics

For all polymers, the used molar amount was calculated based on the respective repetition unit. In a glovebox under an N<sub>2</sub> atmosphere, a scintillation vial (with a magnetic stir bar) was charged with **Fe1** (0.02 mmol, 7 mg), KO<sup>t</sup>Bu (0.05 mmol, 6 mg), H<sub>3</sub>N·BH<sub>3</sub> (0.02 mmol, 1 mg) and MeOH (2 mL). Then, the polymer (1.0 mmol) was added. The mixture was stirred at 80 °C. After the indicated time, the reaction mixture was isolated by chromatography on silica gel to give the esters product. After that, the obtained esters were processed according to Section S3 to get diols.

## 5. General procedure for autoclave reactions

Experiments with compressed gases must be carried out only with appropriate equipment and under rigorous safety precautions.

Processed polymer was filled under air into a glass insert of an autoclave, a stir bar was added, and the insert was placed in a 250 mL steel autoclave. Subsequently, the autoclave was evacuated and backfilled with N<sub>2</sub> three times. **Fe1** and KO<sup>t</sup>Bu were weighed in a 10 mL Schlenk tube and dissolved in 5 mL THF. The solution was transferred via syringe, equipped with a cannular, into the autoclave in an N<sub>2</sub> counter stream. The autoclave was pressurized with 20 bar of H<sub>2</sub>. The reaction was stirred at 120 °C for 24 hours. After completion of the reaction time, the autoclave was cooled down to room temperature in an ice bath and carefully vented to atmosphere. The reaction mixture was isolated by chromatography on silica gel to give the product.

## 6. Characterization data for hydrogenation products

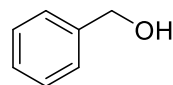 **phenylmethanol (1-4):** <sup>1</sup>H NMR (500 MHz, CDCl<sub>3</sub>) δ 7.32-7.25 (m, 4H), 7.25-7.15 (m, 1H), 4.58 (s, 2H). <sup>13</sup>C NMR (126 MHz, CDCl<sub>3</sub>) δ 140.89 (s), 128.58 (s), 127.67 (s), 127.02 (s), 77.33 (s), 77.08 (s), 76.82 (s), 65.33 (s).

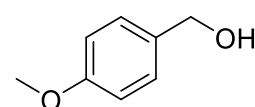 **(4-methoxyphenyl)methanol (5):** <sup>1</sup>H NMR (500 MHz, CDCl<sub>3</sub>) δ 7.16 (d, J = 8.6 Hz, 2H), 6.78 (d, J = 8.6 Hz, 2H), 4.46 (s, 2H), 3.69 (s, 3H). <sup>13</sup>C NMR (126 MHz, CDCl<sub>3</sub>) δ 159.12 (s), 133.20 (s), 128.65 (s), 113.92 (s), 77.39 (s), 77.13 (s), 76.88 (s), 64.82 (s), 55.30 (s).

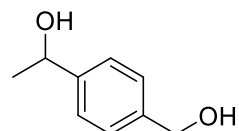 **1-(4-(hydroxymethyl)phenyl)ethan-1-one (6):** <sup>1</sup>H NMR (500 MHz, CDCl<sub>3</sub>) δ 17.15 (q, J = 8.1 Hz, 4H), 4.70 (q, J = 6.4 Hz, 1H), 4.45 (s, 2H),

1.33 (d, J = 6.5 Hz, 3H).  $^{13}\text{C}$  NMR (126 MHz,  $\text{CDCl}_3$ )  $\delta$  145.10 (s), 139.99 (s), 127.09 (s), 125.54 (s), 77.37 (s), 77.11 (s), 76.86 (s), 69.97 (s), 64.62 (s), 25.13 (s).

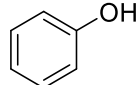 **phenol (7):**  $^1\text{H}$  NMR (500 MHz,  $\text{CDCl}_3$ )  $\delta$  7.39-7.30 (m, 2H), 7.19 (dd, J = 13.3, 5.7 Hz, 3H).  $^{13}\text{C}$  NMR (126 MHz,  $\text{CDCl}_3$ )  $\delta$  152.11 (s), 151.02 (s), 129.60 (s), 126.33 (s), 120.94 (s), 77.30 (s), 77.05 (s), 76.79 (s).

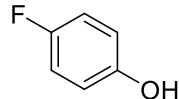 **4-fluorophenol (8):**  $^1\text{H}$  NMR (500 MHz,  $\text{CDCl}_3$ )  $\delta$  6.91-6.77 (m, 2H), 6.75-6.62 (m, 2H).  $^{13}\text{C}$  NMR (126 MHz,  $\text{CDCl}_3$ )  $\delta$  157.27 (s), 155.38 (s), 150.29 (d, J = 2.2 Hz), 115.47-115.02 (m), 114.92 (s), 76.27 (s), 76.01 (s), 75.76 (s).

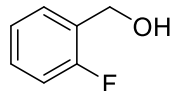 **(2-fluorophenyl)methanol (9):**  $^1\text{H}$  NMR (500 MHz,  $\text{CDCl}_3$ )  $\delta$  7.32-7.23 (m, 1H), 7.15 (ddd, J = 7.4, 6.5, 1.6 Hz, 1H), 7.01 (t, J = 7.5 Hz, 1H), 6.96-6.87 (m, 1H), 4.58 (s, 2H).  $^{13}\text{C}$  NMR (126 MHz,  $\text{CDCl}_3$ )  $\delta$  161.55 (s), 159.60 (s), 129.42-129.18 (m), 127.82 (d, J = 14.7 Hz), 124.21 (d, J = 3.3 Hz), 115.29 (s), 115.12 (s), 77.38 (s), 77.12 (s), 76.87 (s), 59.04 (d, J = 4.5 Hz).

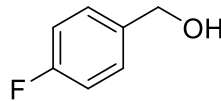 **(4-fluorophenyl)methanol (10):**  $^1\text{H}$  NMR (500 MHz,  $\text{CDCl}_3$ )  $\delta$  7.23 (dd, J = 8.6, 5.5 Hz, 2H), 6.95 (t, J = 8.7 Hz, 2H), 4.54 (s, 2H).  $^{13}\text{C}$  NMR (126 MHz,  $\text{CDCl}_3$ )  $\delta$  163.28 (s), 161.33 (s), 136.58 (d, J = 3.1 Hz), 128.76 (d, J = 8.2 Hz), 115.46 (s), 115.29 (s), 77.31 (s), 77.06 (s), 76.81 (s), 64.56 (s).

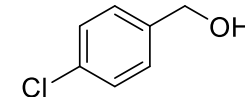 **(4-chlorophenyl)methanol (11):**  $^1\text{H}$  NMR (500 MHz,  $\text{CDCl}_3$ )  $\delta$  7.25 (dt, J = 17.4, 5.3 Hz, 4H), 4.60 (s, 2H).  $^{13}\text{C}$  NMR (126 MHz,  $\text{CDCl}_3$ )  $\delta$  139.26 (s), 133.38 (s), 128.70 (s), 128.29 (s), 77.28 (s), 77.03 (s), 76.77 (s), 64.59 (s).

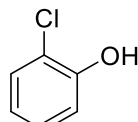 **2-chlorophenol (12):**  $^1\text{H}$  NMR (500 MHz,  $\text{CDCl}_3$ )  $\delta$  7.17 (dd, J = 8.0, 1.3 Hz, 1H), 7.03 (td, J = 8.2, 1.4 Hz, 1H), 6.90 (dd, J = 8.2, 1.3 Hz, 1H), 6.72 (td, J = 8.0, 1.4 Hz, 1H).  $^{13}\text{C}$  NMR (126 MHz,  $\text{CDCl}_3$ )  $\delta$  150.26 (s), 127.98 (s), 127.34 (s), 120.35 (s), 118.86 (s), 115.27 (s), 76.29 (s), 76.03 (s), 75.78 (s).

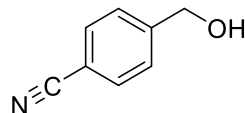 **4-(hydroxymethyl)benzonitrile (13):**  $^1\text{H}$  NMR (500 MHz,  $\text{CDCl}_3$ )  $\delta$  7.29 (d, J = 8.1 Hz, 3H), 7.23 (d, J = 8.0 Hz, 1H), 4.60 (s, 2H).  $^{13}\text{C}$  NMR (126 MHz,  $\text{CDCl}_3$ )  $\delta$  139.90 (s), 128.04 (s), 127.06 (s), 126.59 (s), 116.90 (s), 76.31 (s), 76.05 (s), 75.80 (s), 63.55 (s), 22.30 (s).

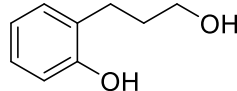 **2-(3-hydroxypropyl)phenol (14):**  $^1\text{H}$  NMR (500 MHz,  $\text{CDCl}_3$ )  $\delta$  7.02 (ddd, J = 6.8, 5.5, 1.6 Hz, 2H), 6.78 (td, J = 8.3, 2.4 Hz, 2H), 3.56 (t, J = 5.8 Hz,

2H), 2.70 (t,  $J = 6.8$  Hz, 2H), 1.84-1.75 (m, 2H).  $^{13}\text{C}$  NMR (126 MHz,  $\text{CDCl}_3$ )  $\delta$  153.45 (s), 129.62 (s), 126.53 (s), 126.26 (s), 119.79 (s), 115.00 (s), 76.26 (s), 76.01 (s), 75.75 (s), 59.78 (s), 31.22 (s), 24.17 (s).

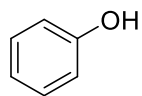

**phenol (15-17):**  $^1\text{H}$  NMR (500 MHz,  $\text{CDCl}_3$ )  $\delta$  7.17 (t,  $J = 7.8$  Hz, 2H), 6.86 (t,  $J = 7.3$  Hz, 1H), 6.76 (d,  $J = 8.3$  Hz, 2H).  $^{13}\text{C}$  NMR (126 MHz,  $\text{CDCl}_3$ )  $\delta$  154.37 (s), 128.66 (s), 119.82 (s), 114.27 (s), 76.25 (s), 76.00 (s), 75.74 (s).

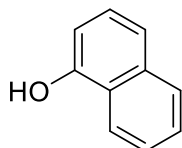

**naphthalen-1-ol (18):**  $^1\text{H}$  NMR (500 MHz,  $\text{CDCl}_3$ )  $\delta$  8.24-8.09 (m, 1H), 7.89-7.74 (m, 1H), 7.60-7.39 (m, 3H), 7.30 (t,  $J = 7.8$  Hz, 1H), 6.80 (d,  $J = 7.4$  Hz, 1H).  $^{13}\text{C}$  NMR (126 MHz,  $\text{CDCl}_3$ )  $\delta$  151.37 (s), 134.78 (s), 127.71 (s), 126.47 (s), 125.86 (s), 125.30 (s), 124.36 (s), 121.55 (s), 120.73 (s), 108.63 (s), 77.31 (s), 77.06 (s), 76.80 (s).

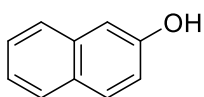

**naphthalen-2-ol (19):**  $^1\text{H}$  NMR (500 MHz,  $\text{CDCl}_3$ )  $\delta$  7.69 (t,  $J = 8.0$  Hz, 2H), 7.61 (d,  $J = 8.2$  Hz, 1H), 7.36 (t,  $J = 7.5$  Hz, 1H), 7.25 (t,  $J = 7.5$  Hz, 1H), 7.08 (d,  $J = 2.0$  Hz, 1H), 7.03 (dd,  $J = 8.8, 2.4$  Hz, 1H).  $^{13}\text{C}$  NMR (126 MHz,  $\text{CDCl}_3$ )  $\delta$  152.28 (s), 133.56 (s), 128.84 (s), 127.94 (s), 126.74 (s), 125.52 (s), 125.33 (s), 122.61 (s), 116.69 (s), 108.46 (s), 76.24 (s), 75.99 (s), 75.74 (s).

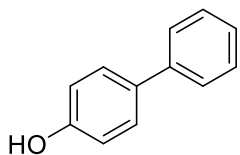

**[1,1'-biphenyl]-4-ol (20):**  $^1\text{H}$  NMR (500 MHz,  $\text{CDCl}_3$ )  $\delta$  7.55-7.52 (m, 2H), 7.49-7.46 (m, 2H), 7.41 (t,  $J = 7.7$  Hz, 2H), 7.37 (d,  $J = 4.6$  Hz, 1H), 6.92-6.87 (m, 2H).  $^{13}\text{C}$  NMR (126 MHz,  $\text{CDCl}_3$ )  $\delta$  155.10 (s), 140.76 (s), 134.00 (s), 128.67 (d,  $J = 13.6$  Hz), 128.39 (s), 127.06 (s), 126.71 (d,  $J = 2.4$  Hz), 115.64 (s), 77.25 (d,  $J = 6.0$  Hz), 77.02 (s), 76.76 (s).

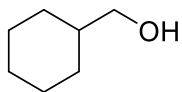

**cyclohexylmethanol (21):**  $^1\text{H}$  NMR (500 MHz,  $\text{CDCl}_3$ )  $\delta$  3.35 (d,  $J = 6.4$  Hz, 2H), 1.77-1.56 (m, 5H), 1.46-1.33 (m, 1H), 1.24-1.06 (m, 3H), 0.94-0.80 (m, 2H).  $^{13}\text{C}$  NMR (126 MHz,  $\text{CDCl}_3$ )  $\delta$  76.33 (s), 76.07 (s), 75.82 (s), 67.64 (s), 39.44 (s), 28.51 (d,  $J = 17.0$  Hz), 25.59 (s), 24.84 (s).

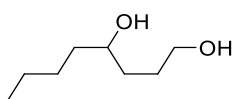

**octane-1,4-diol (22):**  $^1\text{H}$  NMR (500 MHz,  $\text{CDCl}_3$ )  $\delta$  4.53-4.33 (m, 1H), 2.46 (dd,  $J = 9.6, 7.0$  Hz, 2H), 2.26 (td,  $J = 13.4, 6.7$  Hz, 1H), 1.79 (dtd,  $J = 12.7, 9.5, 8.2$  Hz, 1H), 1.67 (dddd,  $J = 13.4, 9.9, 8.3, 4.8$  Hz, 1H), 1.58-1.47 (m, 1H), 1.42-1.22 (m, 4H), 0.85 (dd,  $J = 9.4, 4.7$  Hz, 3H).  $^{13}\text{C}$  NMR (126 MHz,  $\text{CDCl}_3$ )  $\delta$  176.36 (s), 80.09 (s), 76.47 (s), 76.22 (s), 75.96 (s), 34.25 (s), 27.86 (s), 27.00 (s), 26.34 (s), 21.42 (s), 12.91 (s).

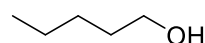

**pentan-1-ol (23):**  $^1\text{H}$  NMR (500 MHz,  $\text{CDCl}_3$ )  $\delta$  3.54 (t,  $J$  = 6.7 Hz, 2H), 1.58-1.42 (m, 2H), 1.32-1.16 (m, 4H), 0.83 (dd,  $J$  = 9.6, 4.3 Hz, 3H).  $^{13}\text{C}$  NMR (126 MHz,  $\text{CDCl}_3$ )  $\delta$  76.36 (s), 76.22 (d,  $J$  = 32.0 Hz), 75.83 (s), 61.84 (s), 31.42 (s), 26.93 (s), 21.50 (s), 13.03 (s).

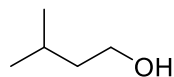

**3-methylbutan-1-ol (24):**  $^1\text{H}$  NMR (500 MHz,  $\text{CDCl}_3$ )  $\delta$  3.52 (t,  $J$  = 7.1 Hz, 2H), 1.62 (dt,  $J$  = 13.4, 6.7 Hz, 1H), 1.36 (dd,  $J$  = 14.1, 7.0 Hz, 2H), 0.83 (d,  $J$  = 6.9 Hz, 6H).  $^{13}\text{C}$  NMR (126 MHz,  $\text{CDCl}_3$ )  $\delta$  76.35 (s), 76.09 (s), 75.84 (s), 60.07 (s), 40.63 (s), 23.69 (s), 21.60 (s).

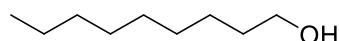

**nonan-1-ol (25):**  $^1\text{H}$  NMR (500 MHz,  $\text{CDCl}_3$ )  $\delta$  3.56 (t,  $J$  = 6.7 Hz, 2H), 1.68 (s, 1H), 1.57-1.41 (m, 2H), 1.34-1.10 (m, 11H), 0.81 (t,  $J$  = 6.9 Hz, 3H).  $^{13}\text{C}$  NMR (126 MHz,  $\text{CDCl}_3$ )  $\delta$  76.29 (s), 76.03 (s), 75.78 (s), 62.01 (s), 31.78 (s), 30.81 (s), 28.70 (s), 28.34 (d,  $J$  = 15.5 Hz), 24.75 (s), 21.65 (s), 13.07 (s).

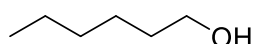

**hexan-1-ol (26):**  $^1\text{H}$  NMR (500 MHz,  $\text{CDCl}_3$ )  $\delta$  3.57 (s, 2H), 1.49 (d,  $J$  = 6.0 Hz, 2H), 1.24 (s, 6H), 0.83 (s, 4H).  $^{13}\text{C}$  NMR (126 MHz,  $\text{CDCl}_3$ )  $\delta$  76.14 (d,  $J$  = 32.0 Hz), 76.00-75.96 (m), 75.76 (s), 31.75 (s), 30.62 (s), 24.40 (s), 21.62 (s), 13.02 (s).

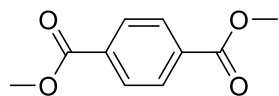

**dimethyl terephthalate (P1):**  $^1\text{H}$  NMR (500 MHz,  $\text{CDCl}_3$ )  $\delta$  8.03 (s, 4H), 3.88 (s, 6H).  $^{13}\text{C}$  NMR (126 MHz,  $\text{CDCl}_3$ )  $\delta$  166.32 (s), 133.92 (s), 129.58 (s), 77.28 (s), 77.03 (s), 76.77 (s), 52.47 (s).

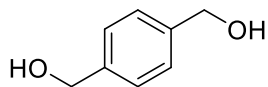

**1,4-phenylenedimethanol (P1'):**  $^1\text{H}$  NMR (500 MHz,  $\text{CDCl}_3$ )  $\delta$  7.30 (s, 4H), 4.63 (s, 4H).  $^{13}\text{C}$  NMR (126 MHz,  $\text{CDCl}_3$ )  $\delta$  139.30 (s), 126.23 (s), 76.25 (s), 75.99 (s), 75.74 (s), 64.12 (s).

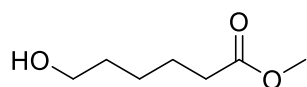

**methyl 6-hydroxyhexanoate (P2):**  $^1\text{H}$  NMR (500 MHz,  $\text{CDCl}_3$ )  $\delta$  3.54 (s, 3H), 3.48 (t,  $J$  = 6.6 Hz, 2H), 2.95 (d,  $J$  = 4.0 Hz, 1H), 2.20 (t,  $J$  = 7.5 Hz, 2H), 1.53 (dt,  $J$  = 15.3, 7.5 Hz, 2H), 1.48-1.39 (m, 2H), 1.35-1.17 (m, 2H).  $^{13}\text{C}$  NMR (126 MHz,  $\text{CDCl}_3$ )  $\delta$  173.37 (s), 76.55 (s), 76.29 (s), 76.04 (s), 61.22 (s), 50.51 (s), 32.99 (s), 31.24 (s), 24.33 (s), 23.68 (s).

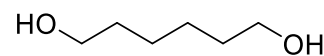

**hexane-1,6-diol (P2'):**  $^1\text{H}$  NMR (500 MHz,  $\text{CDCl}_3$ )  $\delta$  3.58 (t,  $J$  = 6.0 Hz, 4H), 1.52 (s, 4H), 1.34 (d,  $J$  = 6.8 Hz, 4H).  $^{13}\text{C}$  NMR (126 MHz,  $\text{CDCl}_3$ )  $\delta$  76.28 (s), 76.03 (s), 75.77 (s), 61.76 (s), 31.61 (s), 24.49 (s).

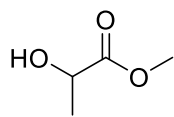

**methyl 2-hydroxypropanoate (P3):**  $^1\text{H}$  NMR (500 MHz,  $\text{CDCl}_3$ )  $\delta$  4.23 (q,  $J$  = 6.9 Hz, 1H), 3.70 (d,  $J$  = 9.6 Hz, 3H), 1.35 (d,  $J$  = 6.9 Hz, 3H).  $^{13}\text{C}$  NMR (126 MHz,  $\text{CDCl}_3$ )  $\delta$  175.12 (s), 76.47 (s), 76.22 (s), 75.96 (s), 65.80 (s), 51.43 (s),

19.30 (d,  $J$  = 3.5 Hz).

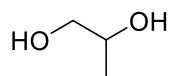

**propane-1,2-diol (P3'):**  $^1\text{H}$  NMR (500 MHz,  $\text{CDCl}_3$ )  $\delta$  3.95-3.61 (m, 1H), 3.48 (dd,  $J$  = 11.4, 3.0 Hz, 1H), 3.29 (dd,  $J$  = 11.4, 7.8 Hz, 1H), 1.05 (d,  $J$  = 6.5 Hz, 3H).  $^{13}\text{C}$  NMR (126 MHz,  $\text{CDCl}_3$ )  $\delta$  76.44 (s), 76.19 (s), 75.93 (s), 67.29 (s), 66.78 (s), 17.69 (s).

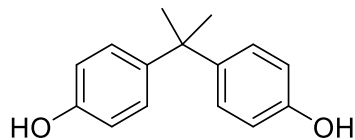

**4,4'-(propane-2,2-diyl)diphenol (P4):**  $^1\text{H}$  NMR (500 MHz, MeOD)  $\delta$  7.02 (d,  $J$  = 8.6 Hz, 4H), 6.66 (d,  $J$  = 8.7 Hz, 4H), 1.57 (s, 6H).  $^{13}\text{C}$  NMR (126 MHz, MeOD)  $\delta$  154.53 (s), 142.09 (s), 127.35 (s), 114.15 (s), 48.14 (s), 47.97 (s), 47.80 (s), 47.63 (s), 47.46 (s), 47.29 (s), 47.12 (s), 41.10 (s), 30.30 (s).



## 7. NMR spectra of the products

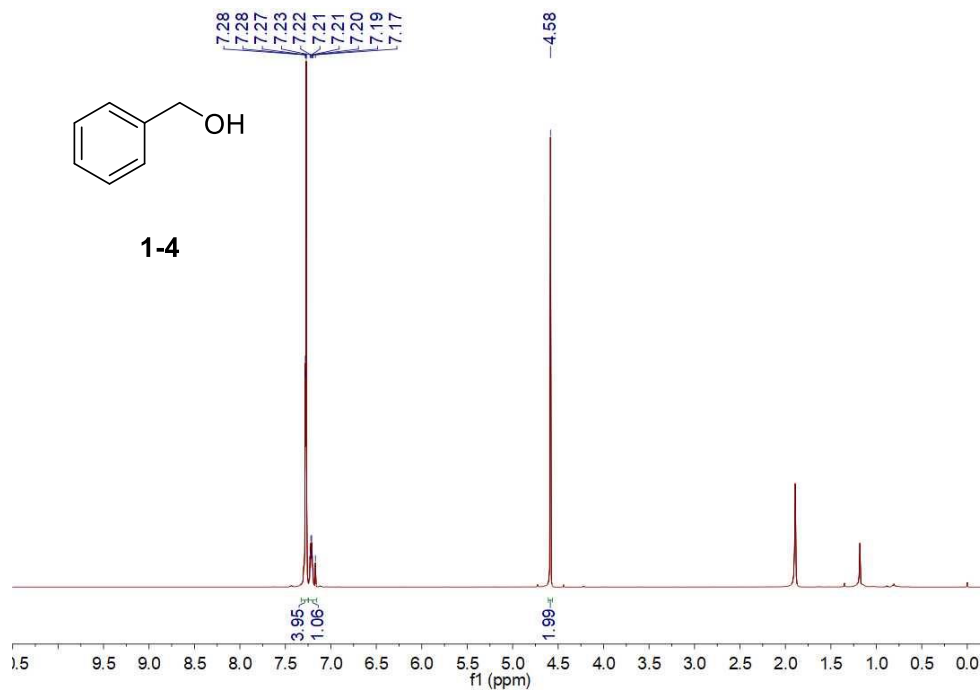

Figure S1. <sup>1</sup>H NMR (500 MHz, CDCl<sub>3</sub>) spectrum of 1.

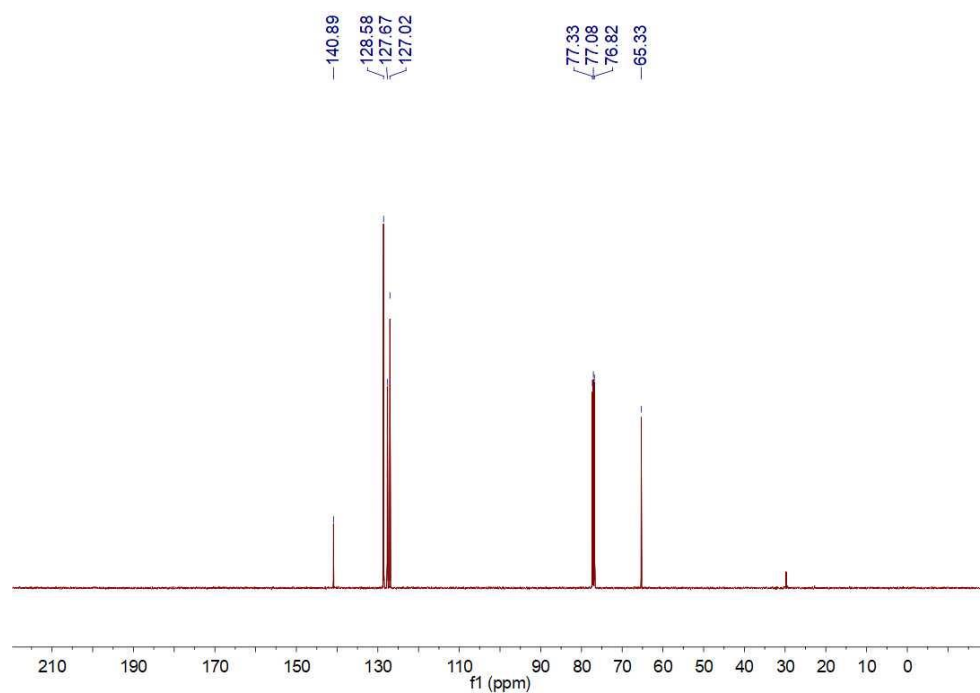

Figure S2. <sup>13</sup>C NMR (126 MHz, CDCl<sub>3</sub>) spectrum of 1.

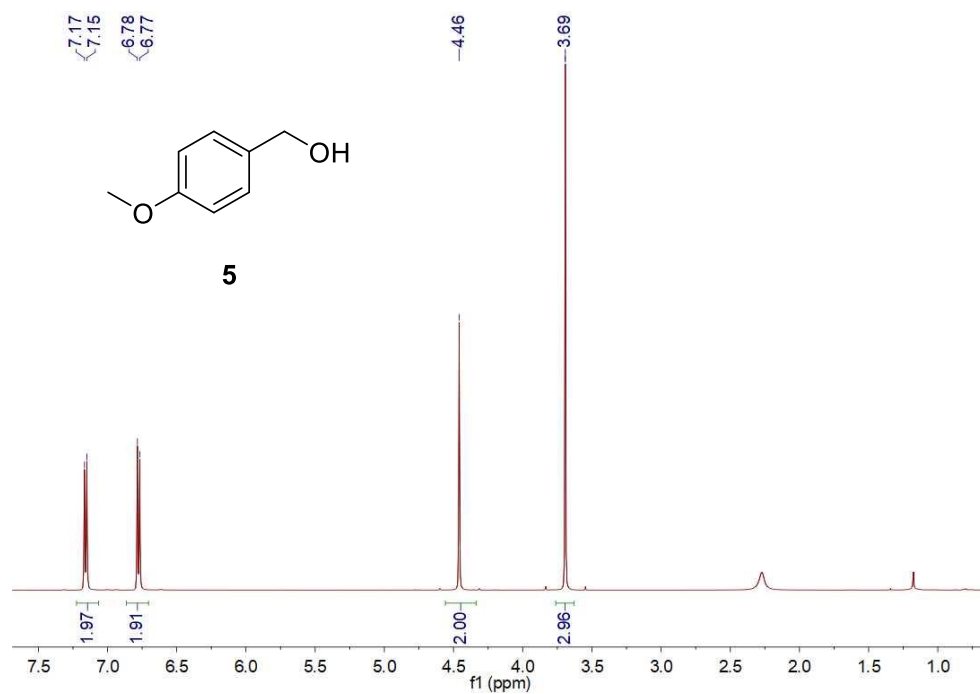

**Figure S3.** <sup>1</sup>H NMR (500 MHz, CDCl<sub>3</sub>) spectrum of **5**.

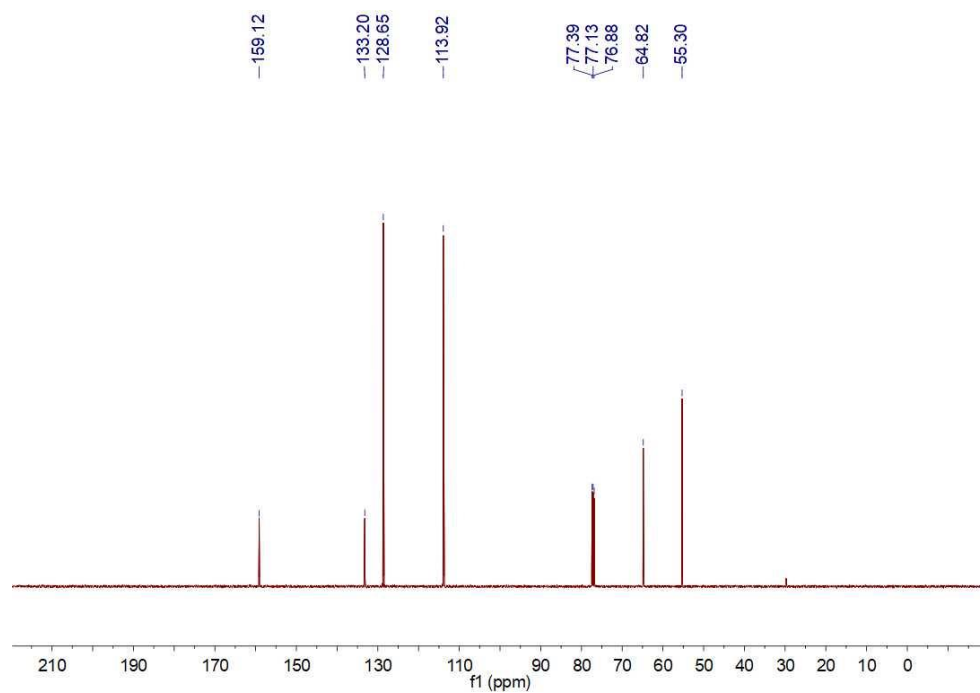

**Figure S4.** <sup>13</sup>C NMR (126 MHz, CDCl<sub>3</sub>) spectrum of **5**.

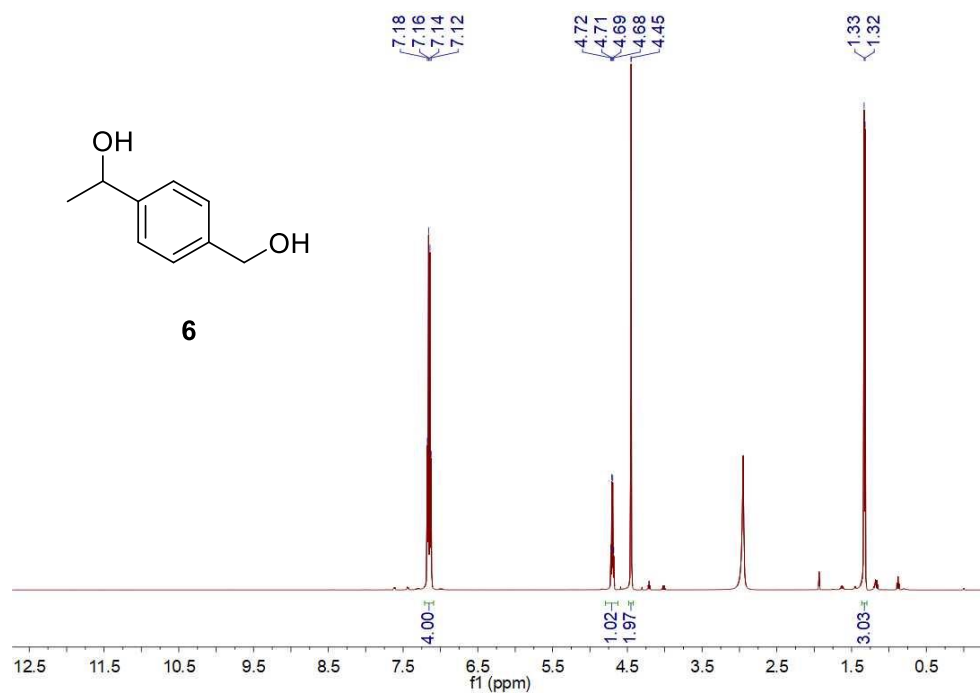

**Figure S5.** <sup>1</sup>H NMR (500 MHz, CDCl<sub>3</sub>) spectrum of **6**.

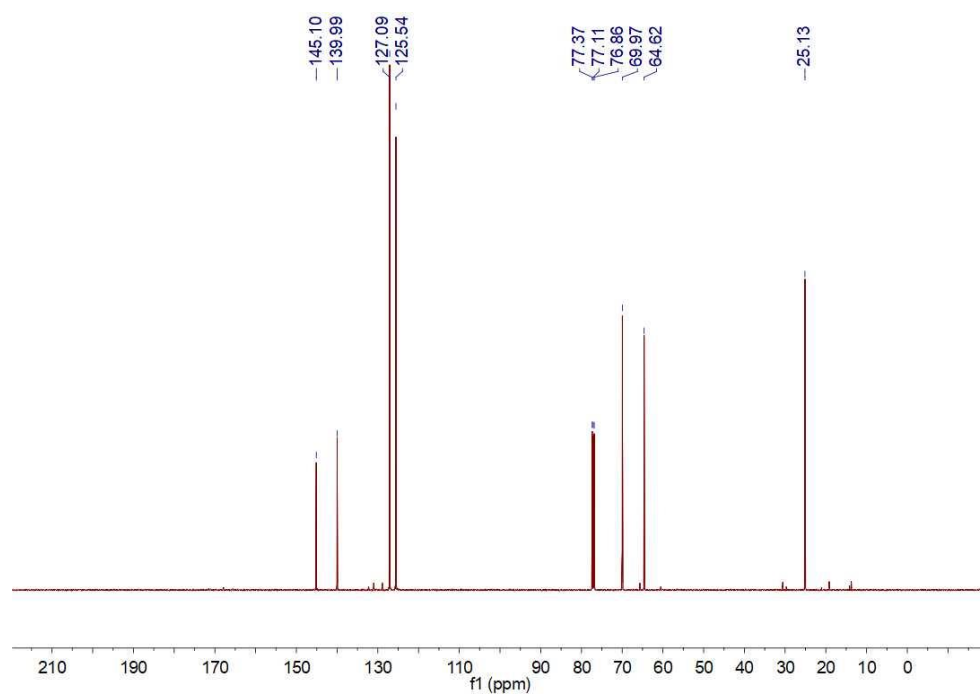

**Figure S6.** <sup>13</sup>C NMR (126 MHz, CDCl<sub>3</sub>) spectrum of **6**.

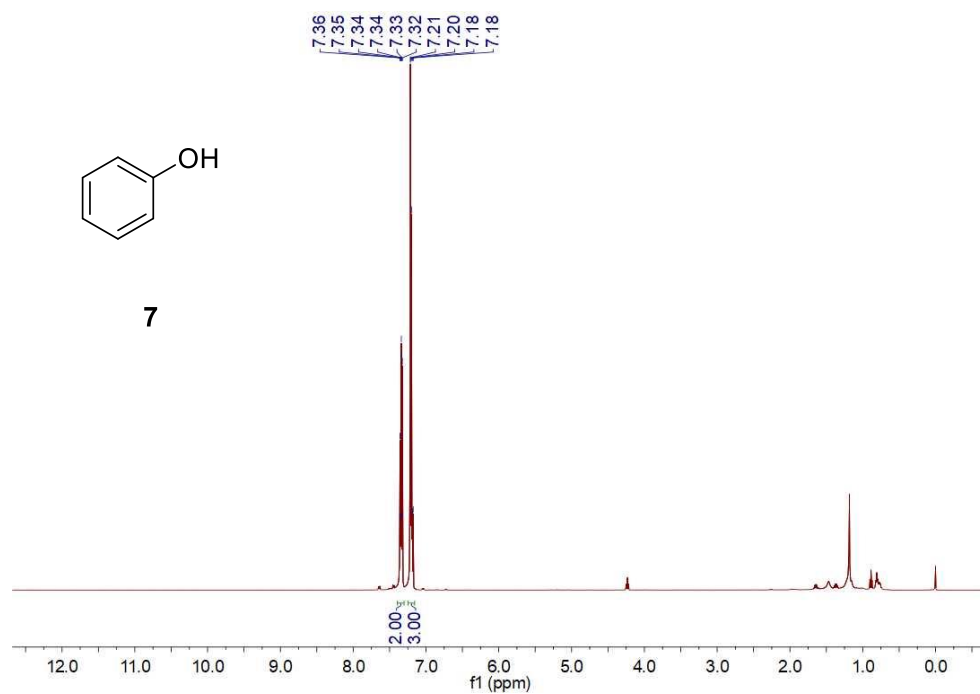

**Figure S7.** <sup>1</sup>H NMR (500 MHz, CDCl<sub>3</sub>) spectrum of **7**.

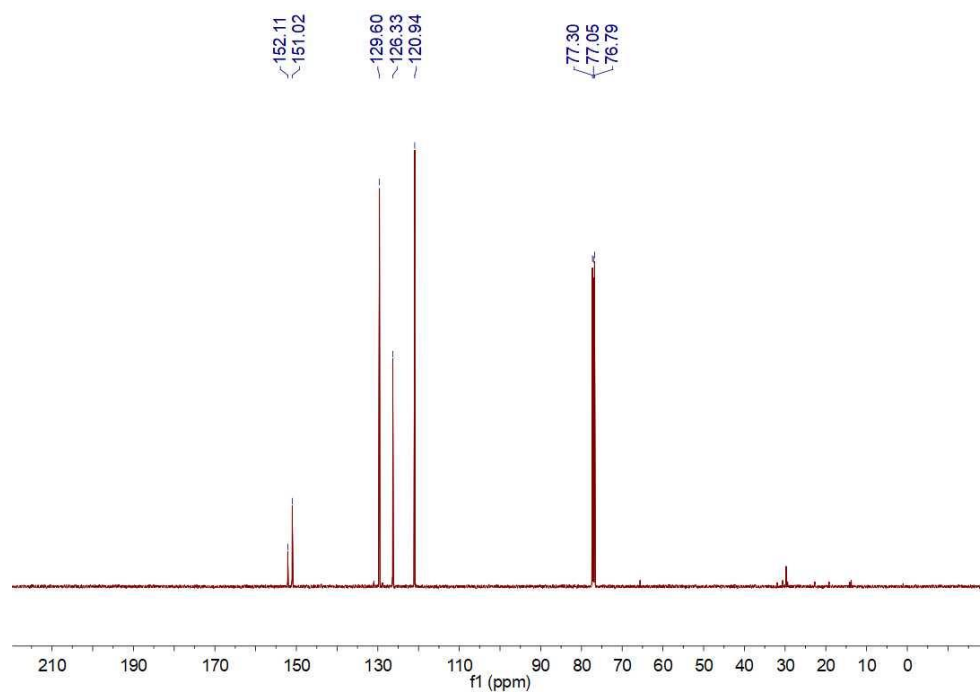

**Figure S8.** <sup>13</sup>C NMR (126 MHz, CDCl<sub>3</sub>) spectrum of **7**.

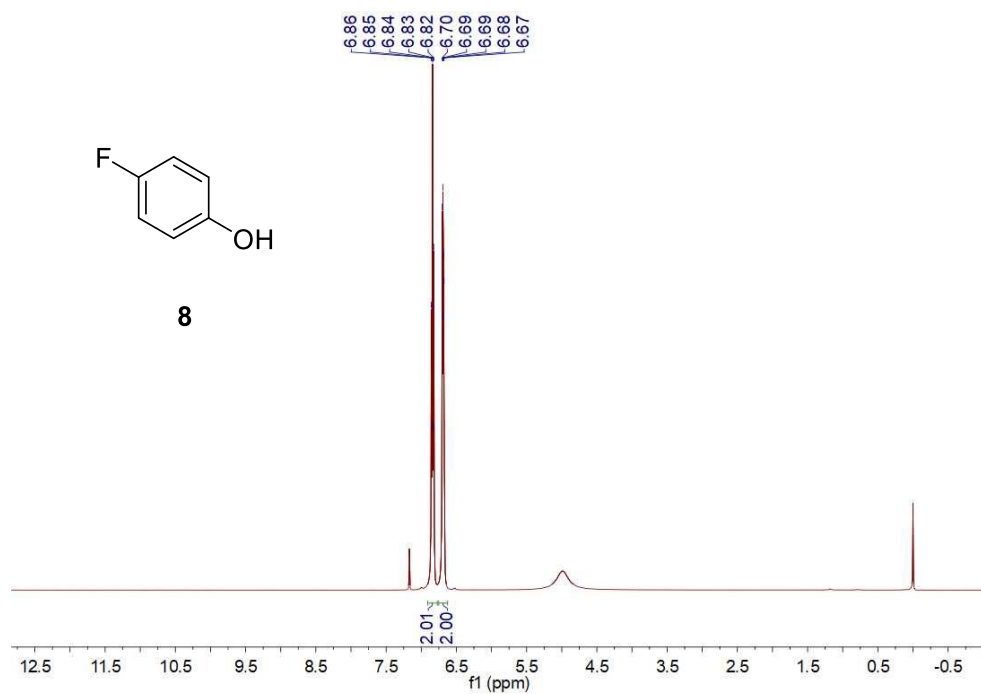

**Figure S9.** <sup>1</sup>H NMR (500 MHz, CDCl<sub>3</sub>) spectrum of **8**.

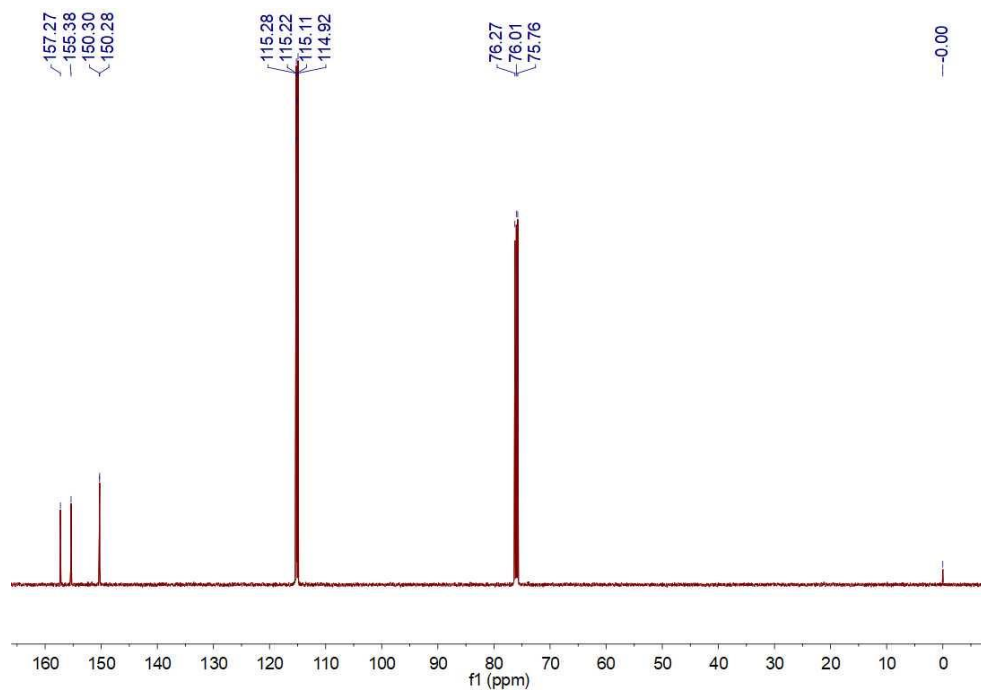

**Figure S10.** <sup>13</sup>C NMR (126 MHz, CDCl<sub>3</sub>) spectrum of **8**.

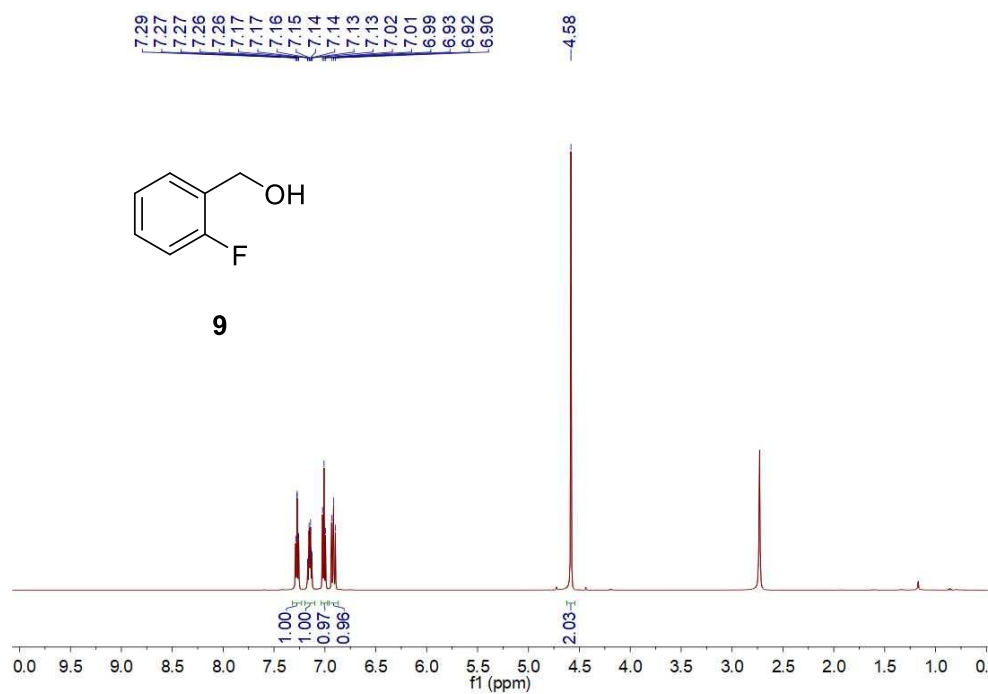

**Figure S11.** <sup>1</sup>H NMR (500 MHz, CDCl<sub>3</sub>) spectrum of **9**.

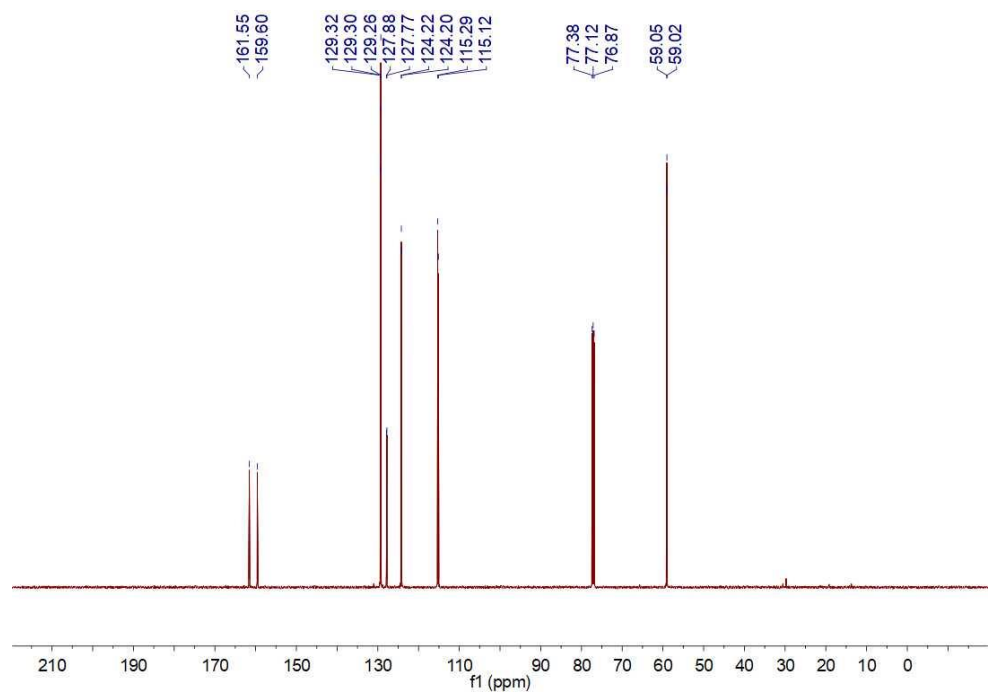

**Figure S12.** <sup>13</sup>C NMR (126 MHz, CDCl<sub>3</sub>) spectrum of **9**.

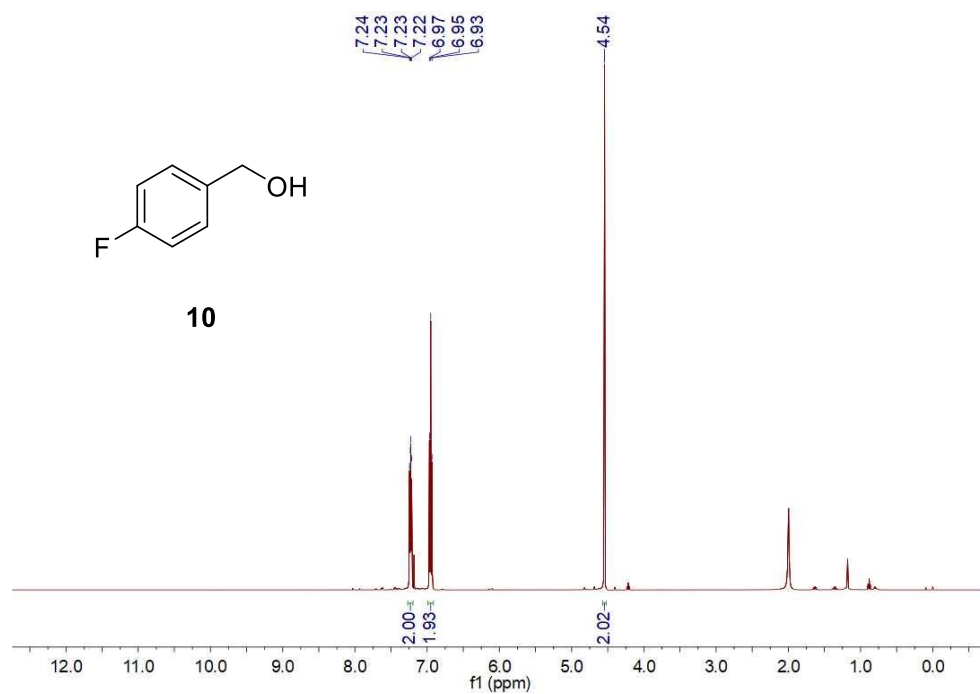

**Figure S13.** <sup>1</sup>H NMR (500 MHz, CDCl<sub>3</sub>) spectrum of **10**.

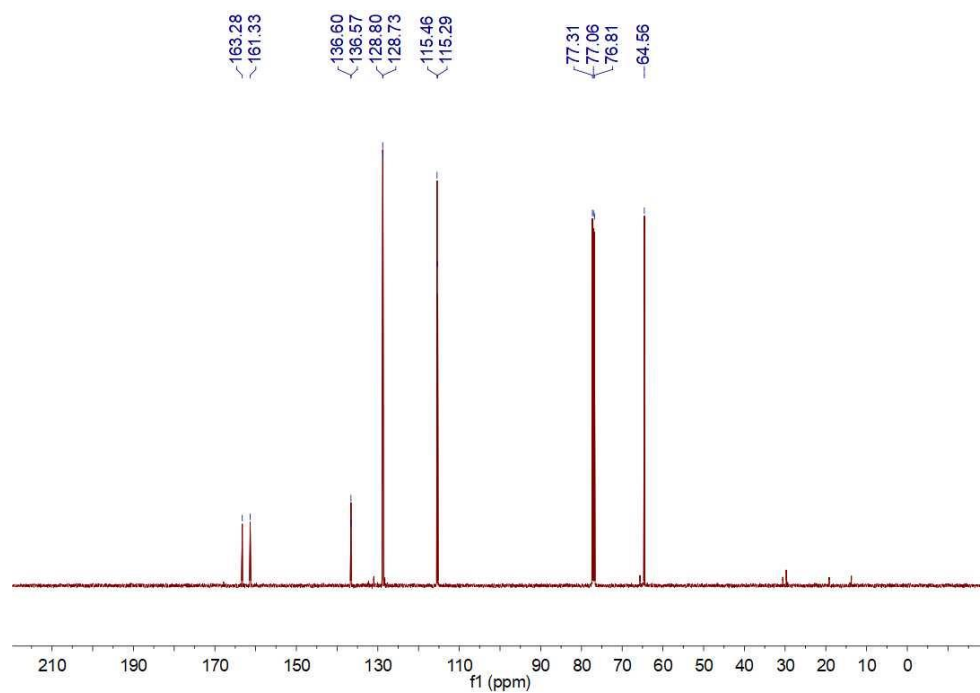

**Figure S14.** <sup>13</sup>C NMR (126 MHz, CDCl<sub>3</sub>) spectrum of **10**.

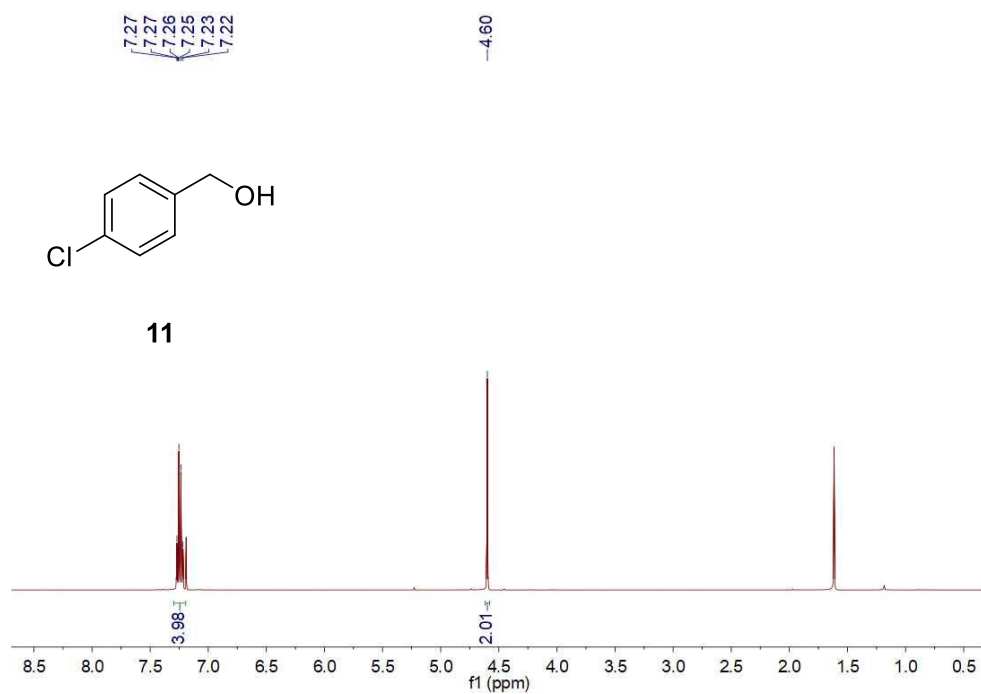

**Figure S15.** <sup>1</sup>H NMR (500 MHz, CDCl<sub>3</sub>) spectrum of **11**.

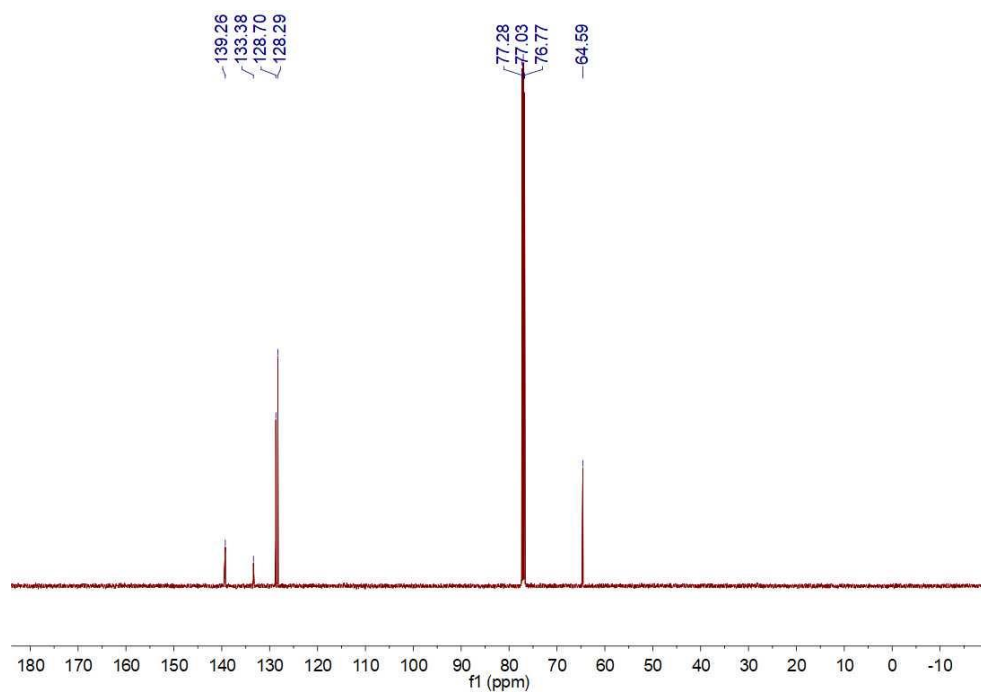

**Figure S16.** <sup>13</sup>C NMR (126 MHz, CDCl<sub>3</sub>) spectrum of **11**.



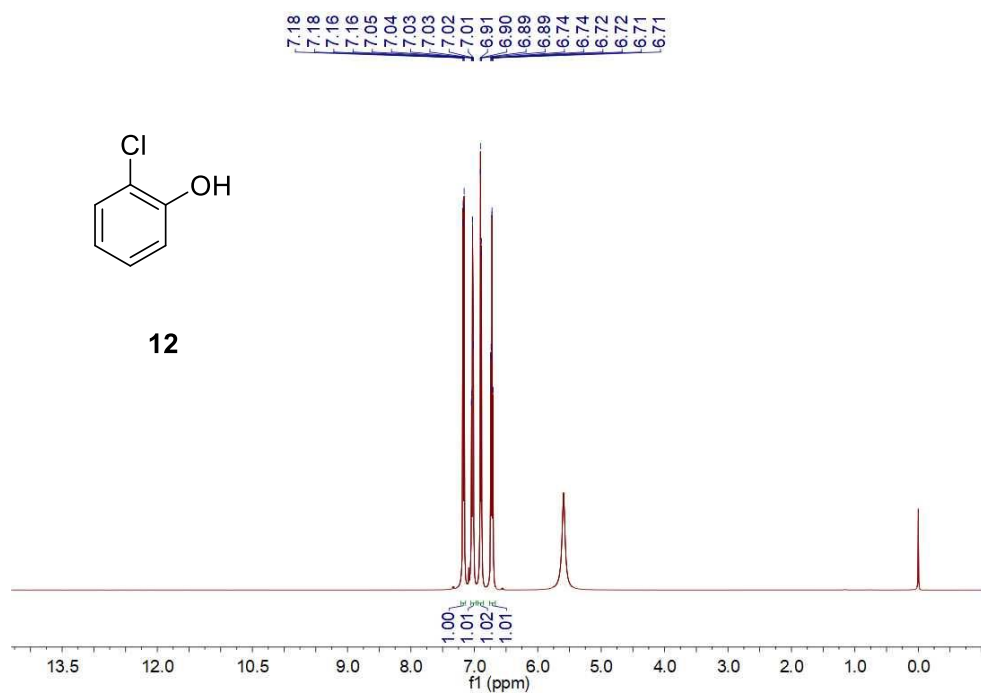

**Figure S17.** <sup>1</sup>H NMR (500 MHz, CDCl<sub>3</sub>) spectrum of **12**.

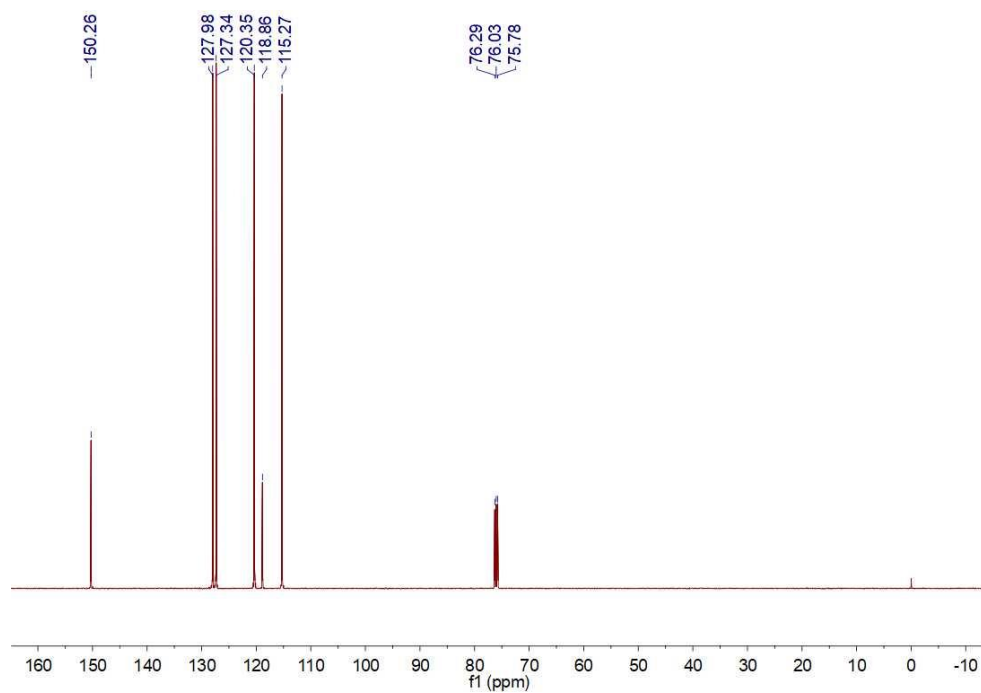

**Figure S18.** <sup>13</sup>C NMR (126 MHz, CDCl<sub>3</sub>) spectrum of **12**.

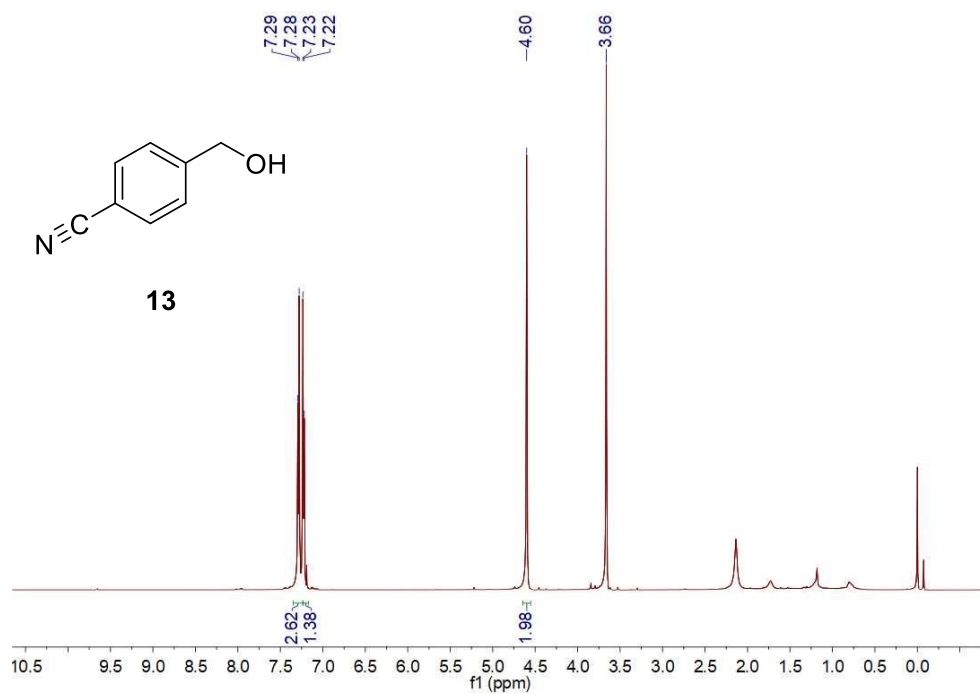

**Figure S19.** <sup>1</sup>H NMR (500 MHz, CDCl<sub>3</sub>) spectrum of **13**.

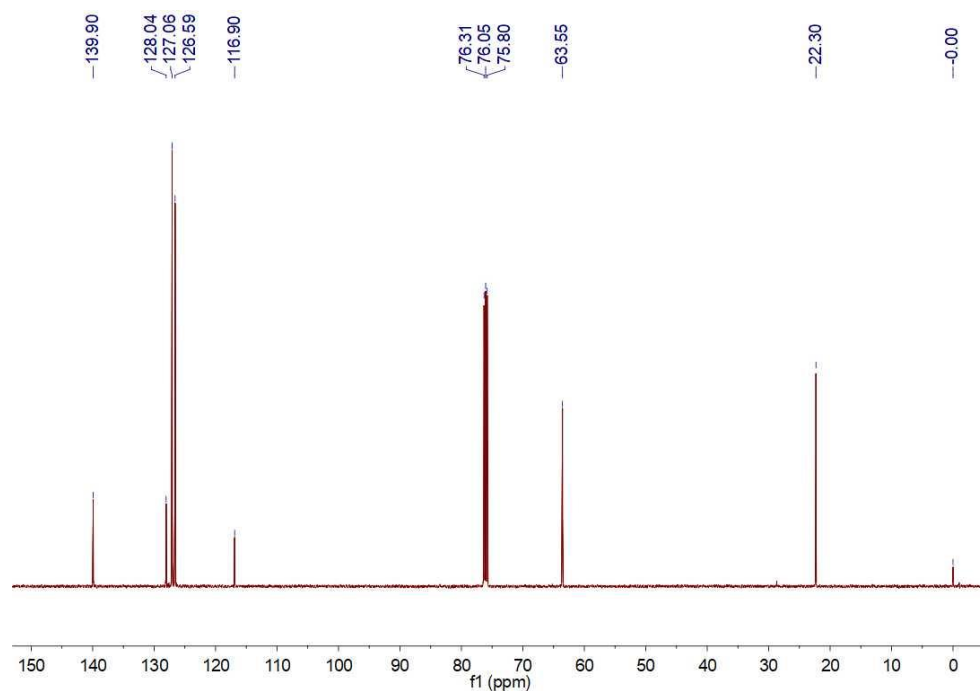

**Figure S20.** <sup>13</sup>C NMR (126 MHz, CDCl<sub>3</sub>) spectrum of **13**.

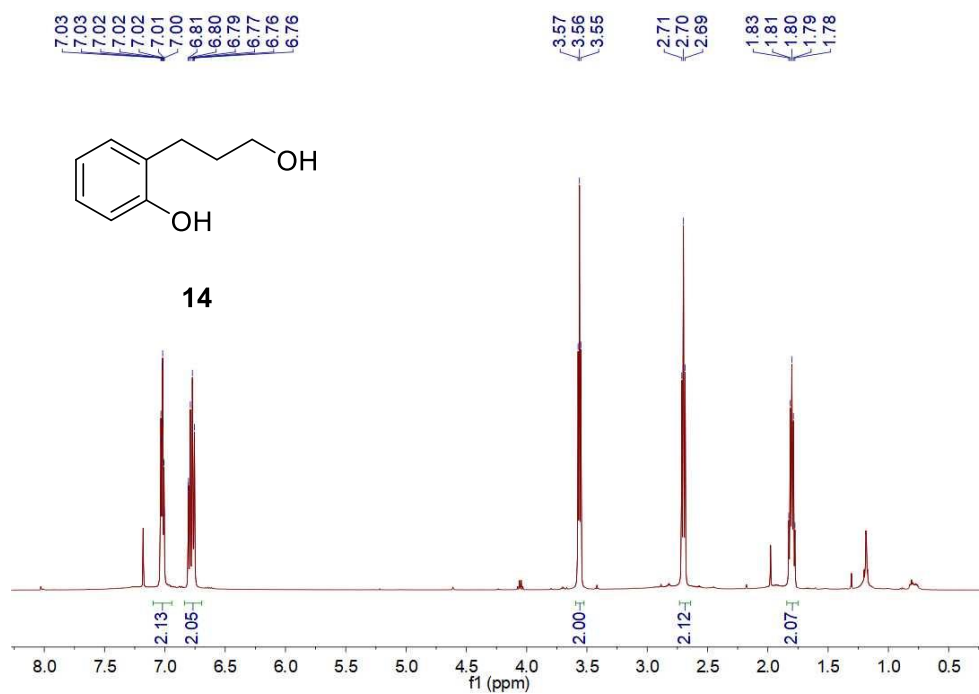

**Figure S21.** <sup>1</sup>H NMR (500 MHz, CDCl<sub>3</sub>) spectrum of **14**.

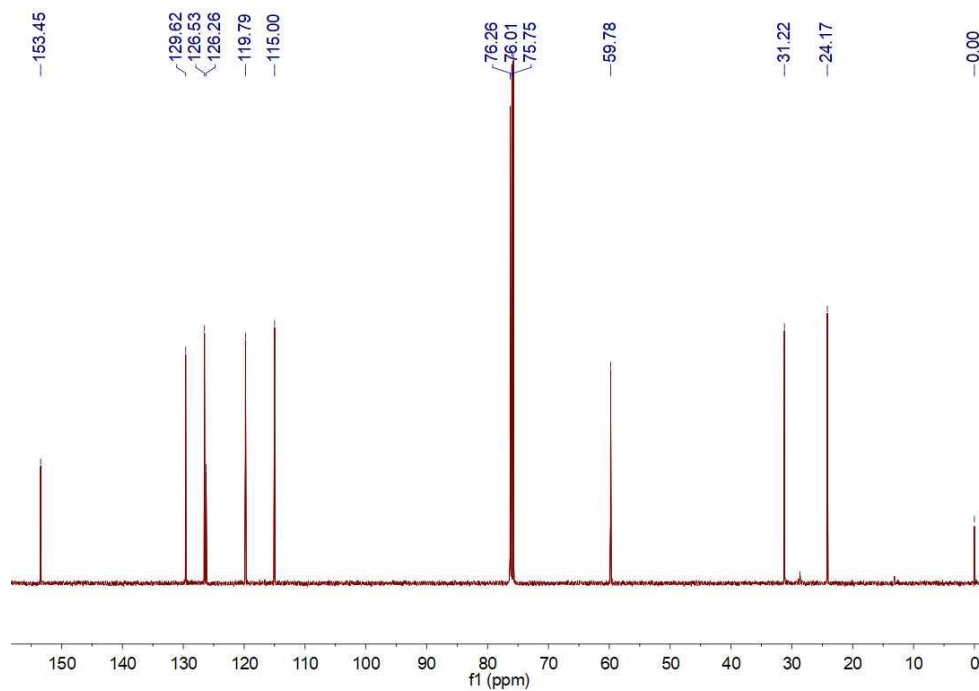

**Figure S22.** <sup>13</sup>C NMR (126 MHz, CDCl<sub>3</sub>) spectrum of **14**.

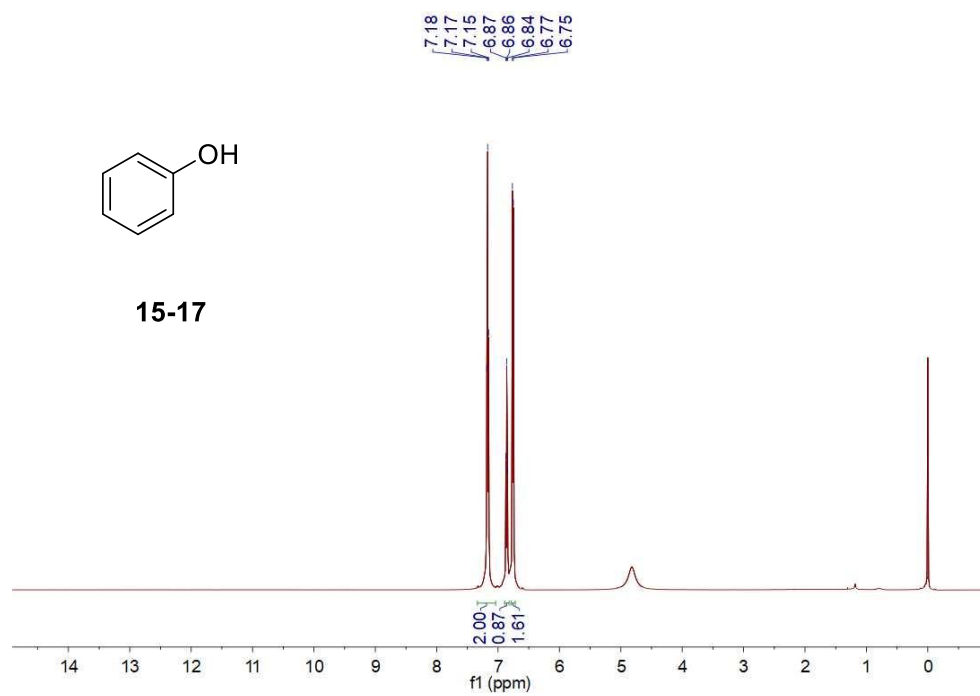

**Figure S23.** <sup>1</sup>H NMR (500 MHz, CDCl<sub>3</sub>) spectrum of **15-17**.

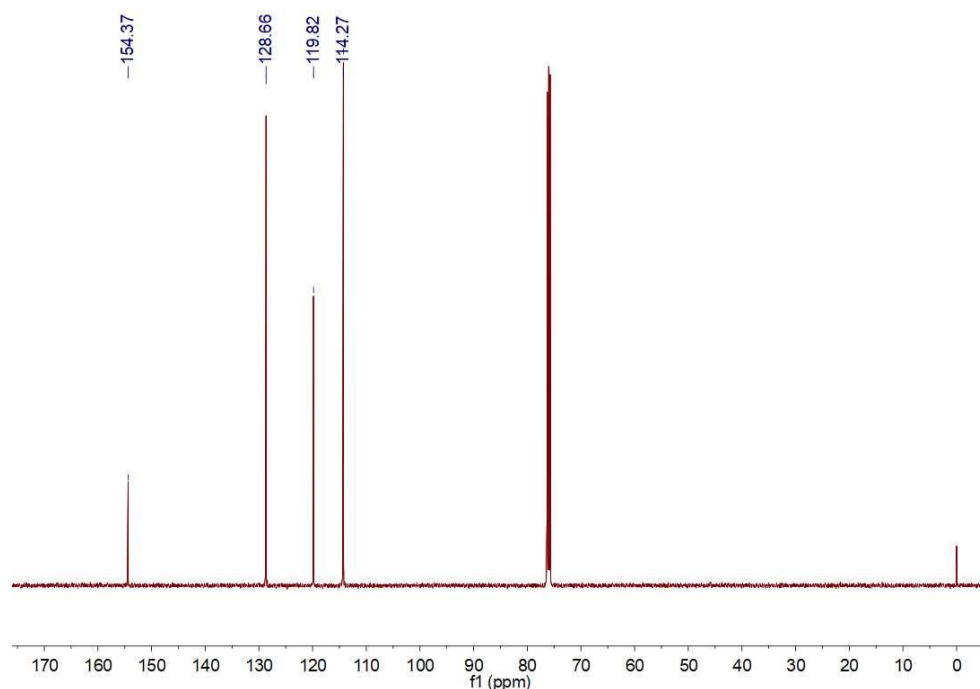

**Figure S24.** <sup>13</sup>C NMR (126 MHz, CDCl<sub>3</sub>) spectrum of **15-17**.

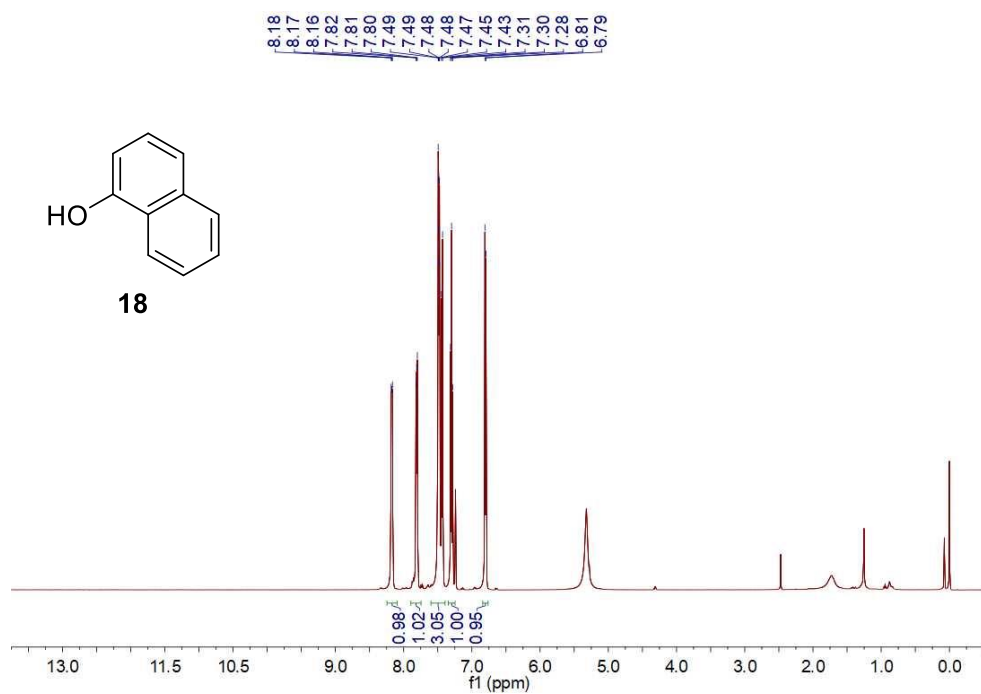

**Figure S25.** <sup>1</sup>H NMR (500 MHz, CDCl<sub>3</sub>) spectrum of **18**.

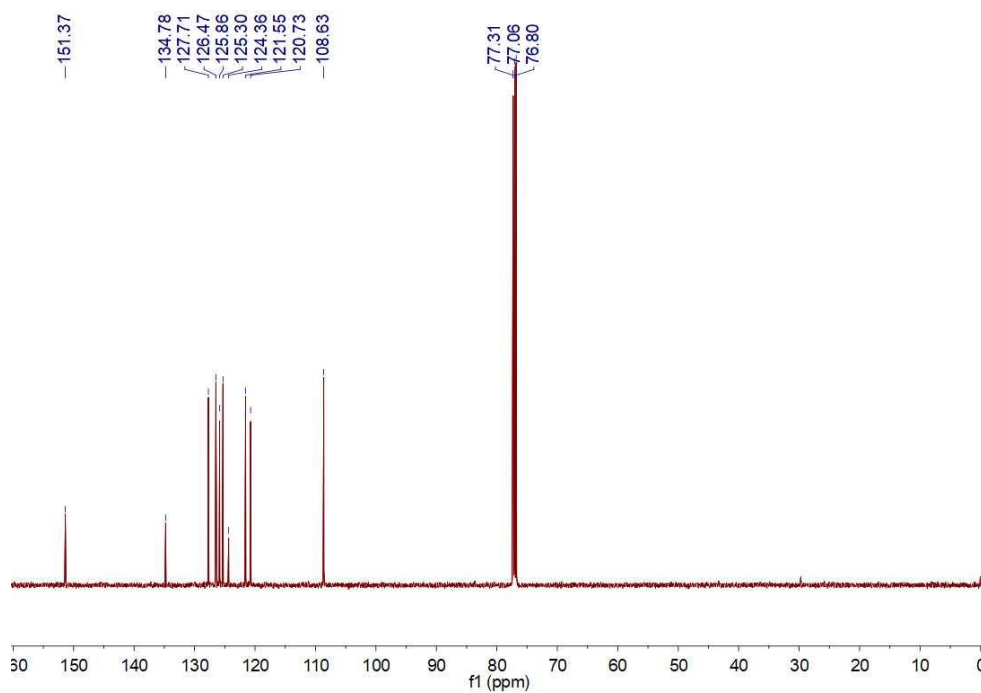

**Figure S26.** <sup>13</sup>C NMR (126 MHz, CDCl<sub>3</sub>) spectrum of **18**.

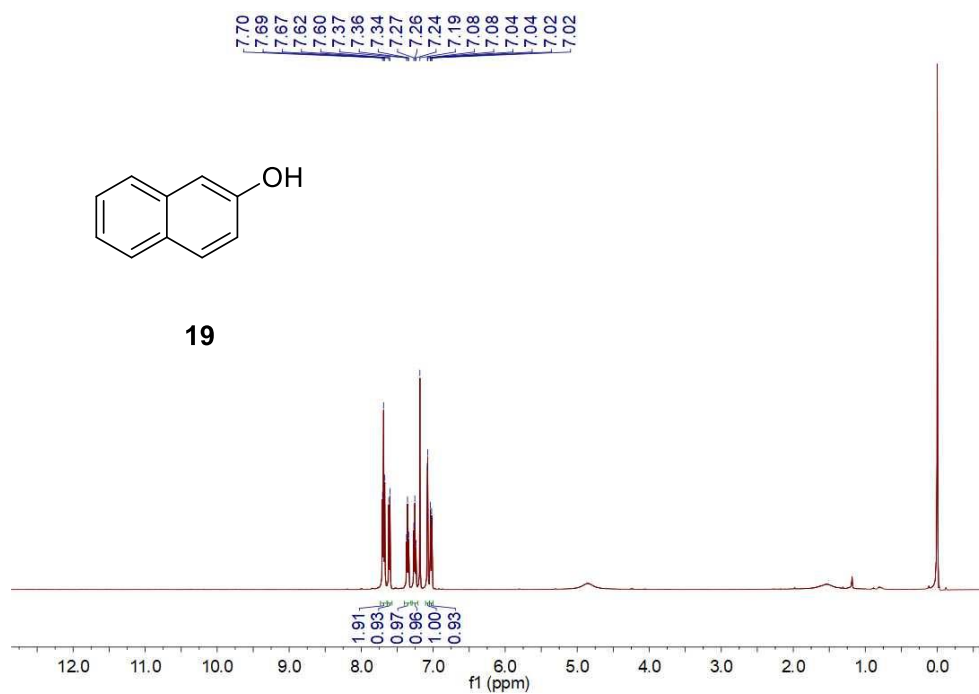

**Figure S27.** <sup>1</sup>H NMR (500 MHz, CDCl<sub>3</sub>) spectrum of **19**.

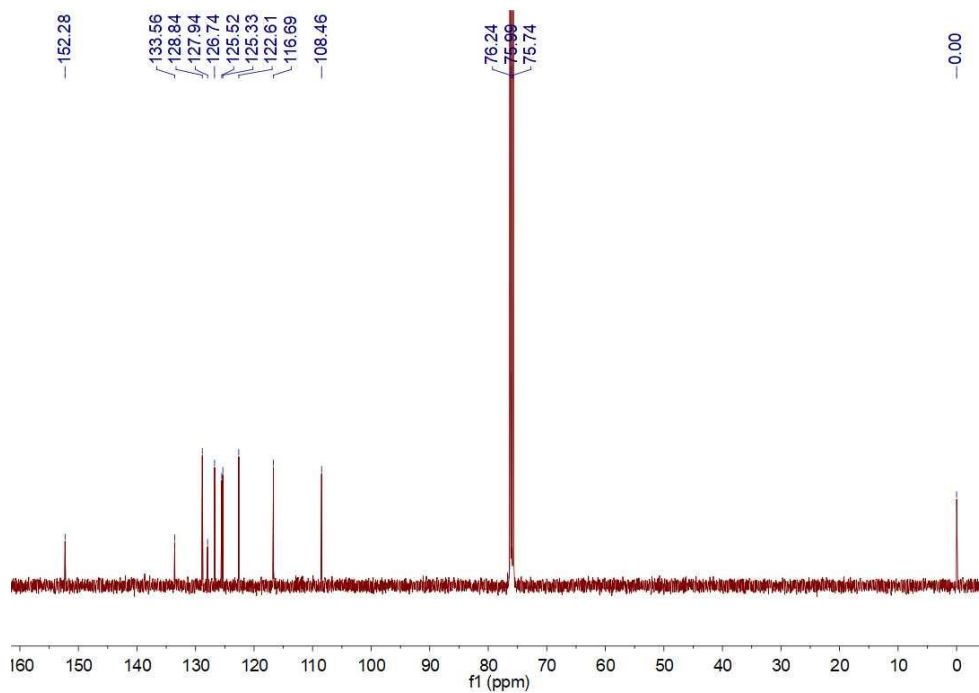

**Figure S28.** <sup>13</sup>C NMR (126 MHz, CDCl<sub>3</sub>) spectrum of **19**.

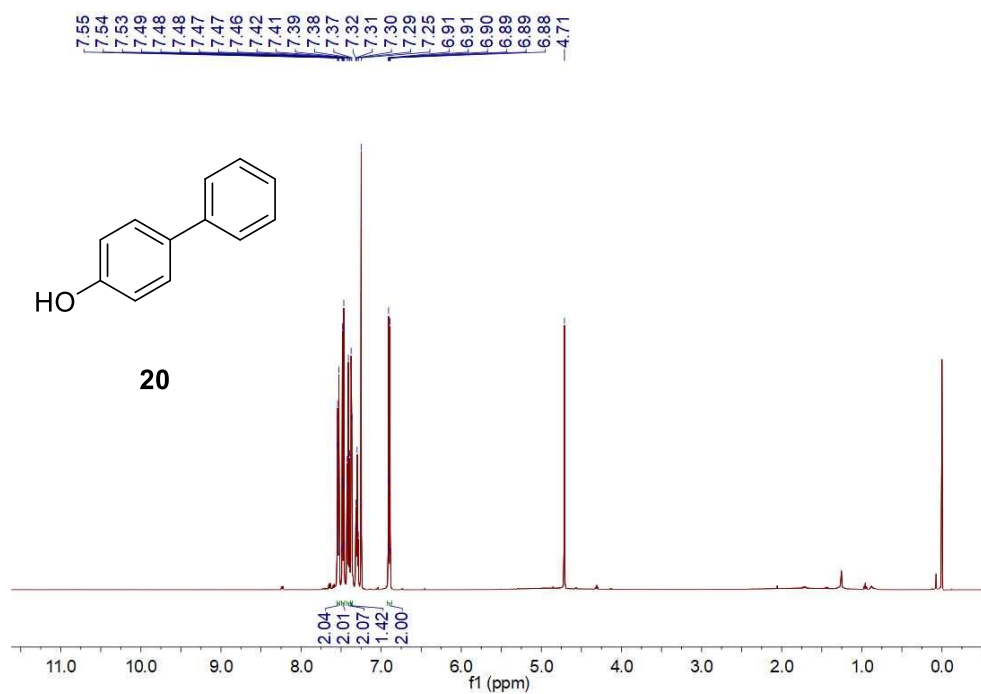

**Figure S29.** <sup>1</sup>H NMR (500 MHz, CDCl<sub>3</sub>) spectrum of **20**.

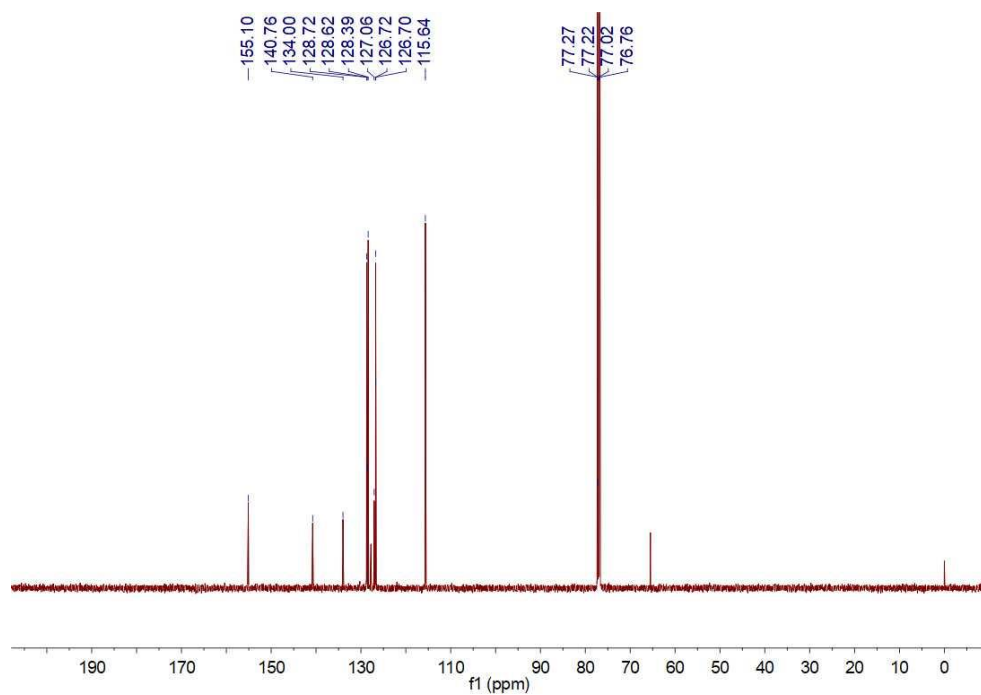

**Figure S30.** <sup>13</sup>C NMR (126 MHz, CDCl<sub>3</sub>) spectrum of **20**.

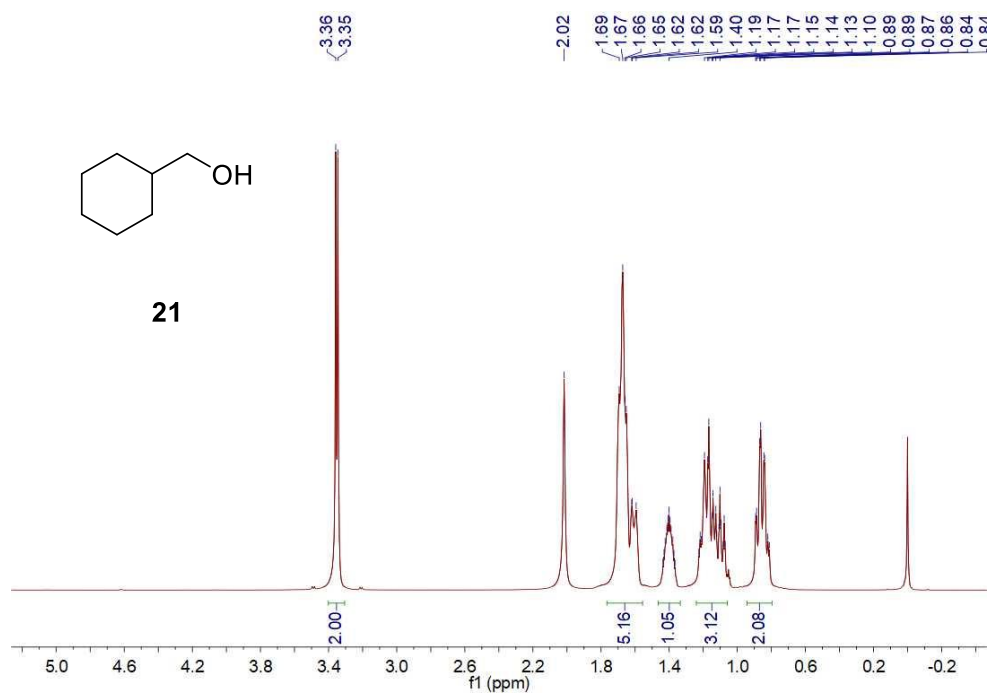

**Figure S31.** <sup>1</sup>H NMR (500 MHz, CDCl<sub>3</sub>) spectrum of **21**.

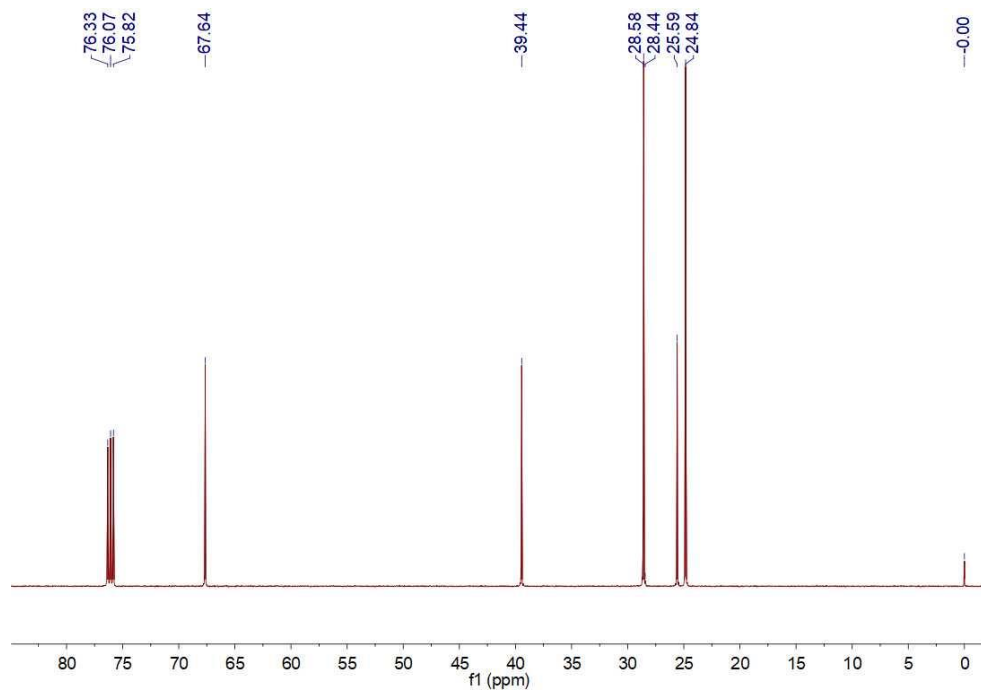

**Figure S32.** <sup>13</sup>C NMR (126 MHz, CDCl<sub>3</sub>) spectrum of **21**.



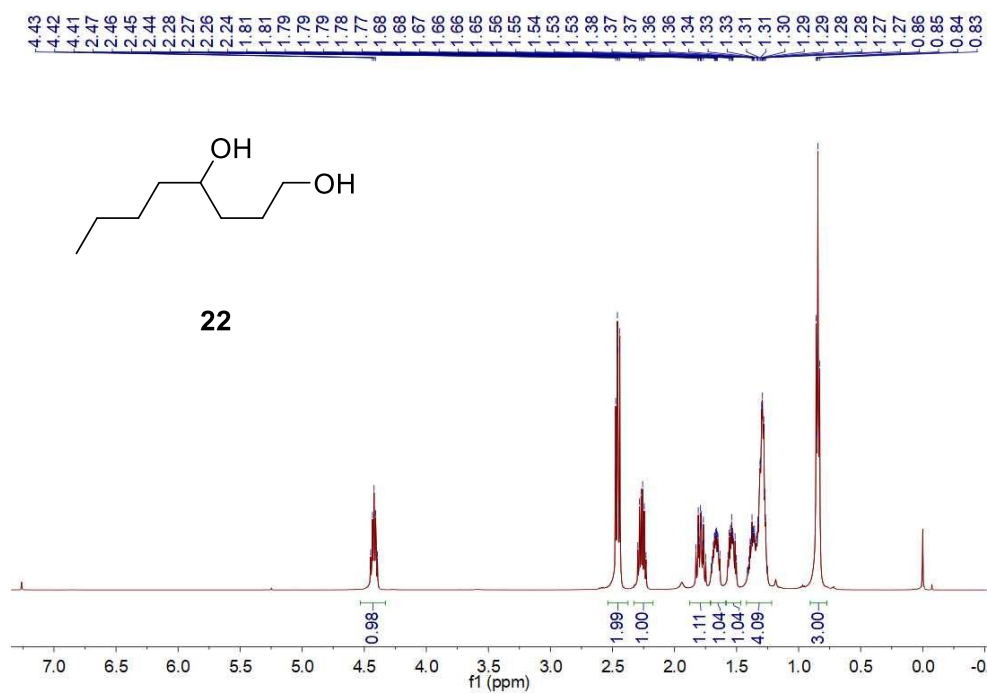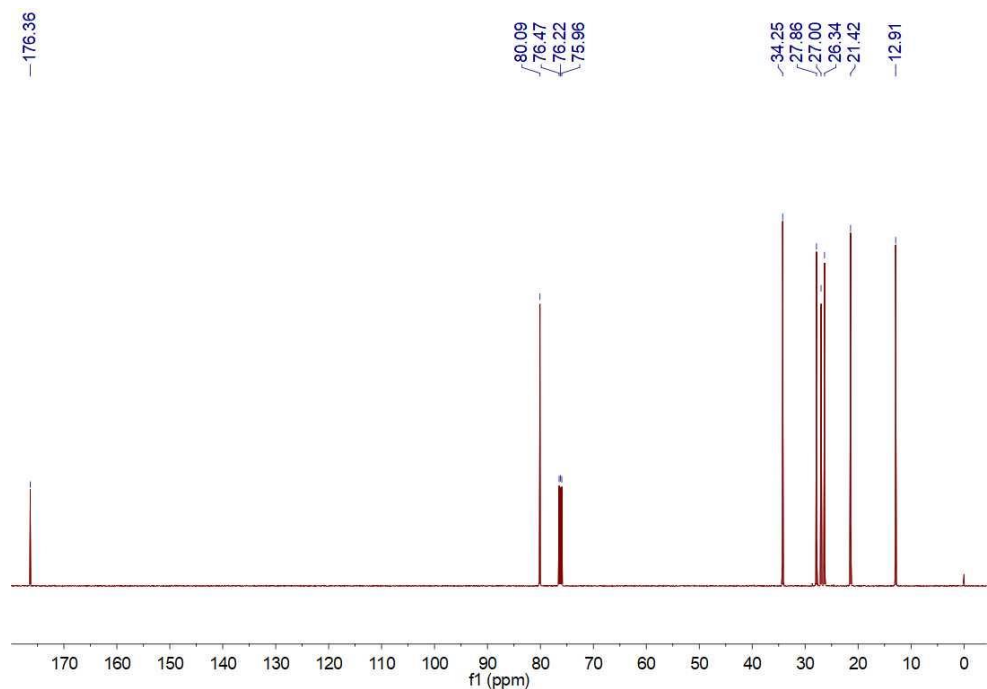

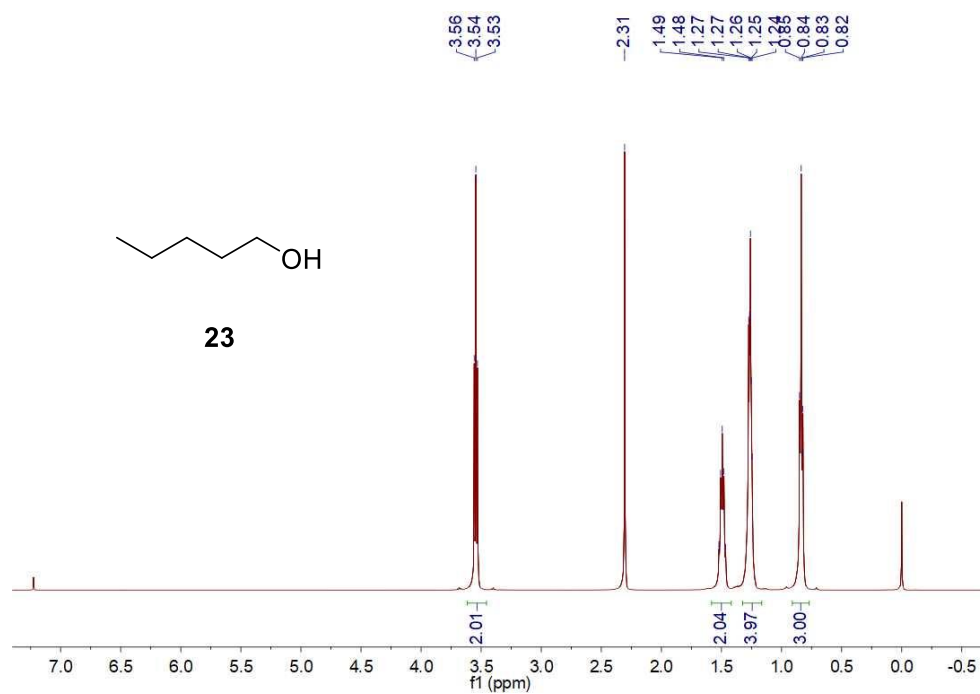

**Figure S35.** <sup>1</sup>H NMR (500 MHz, CDCl<sub>3</sub>) spectrum of **23**.

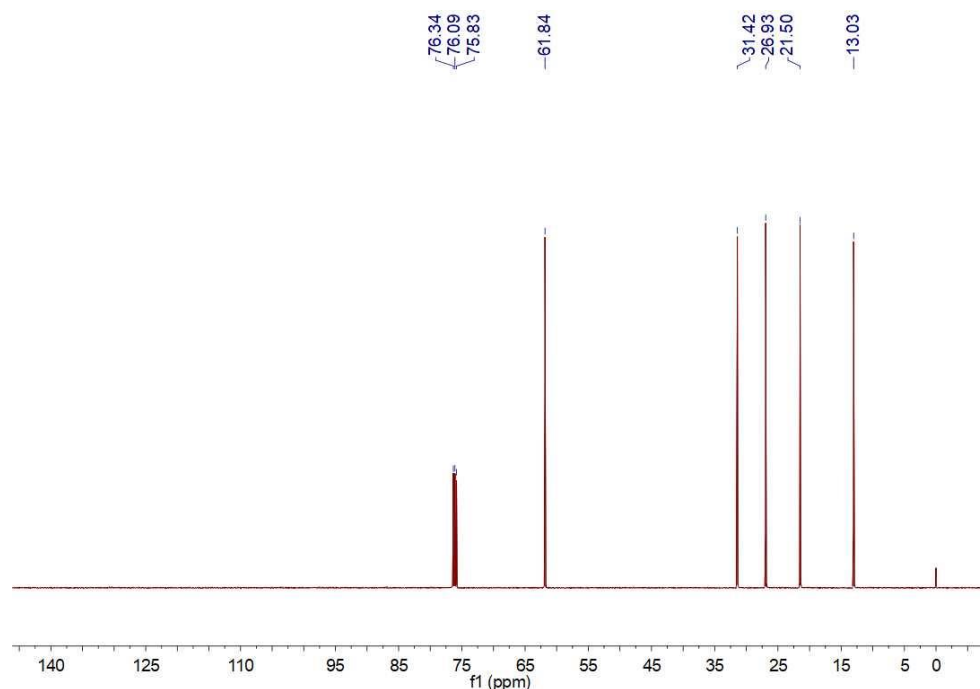

**Figure S36.** <sup>13</sup>C NMR (126 MHz, CDCl<sub>3</sub>) spectrum of **23**.

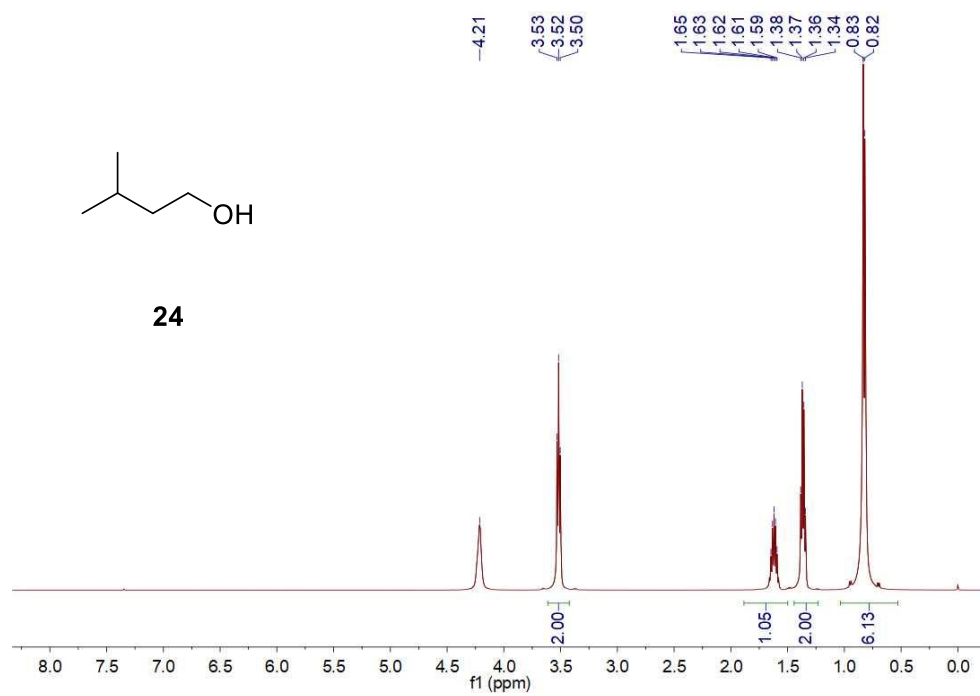

**Figure S37.** <sup>1</sup>H NMR (500 MHz, CDCl<sub>3</sub>) spectrum of **24**.

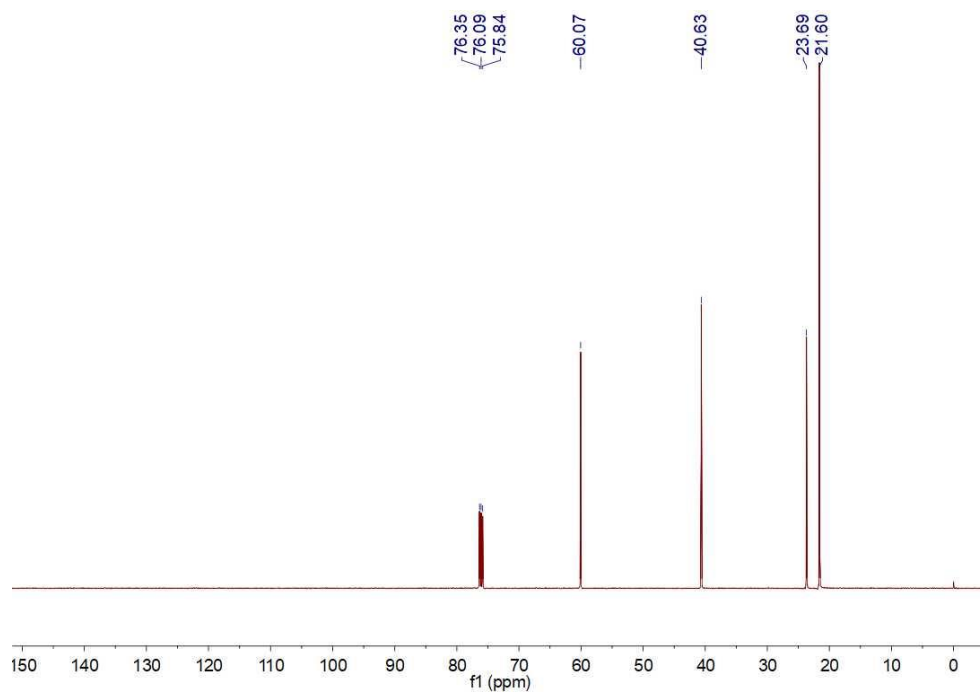

**Figure S38.** <sup>13</sup>C NMR (126 MHz, CDCl<sub>3</sub>) spectrum of **24**.

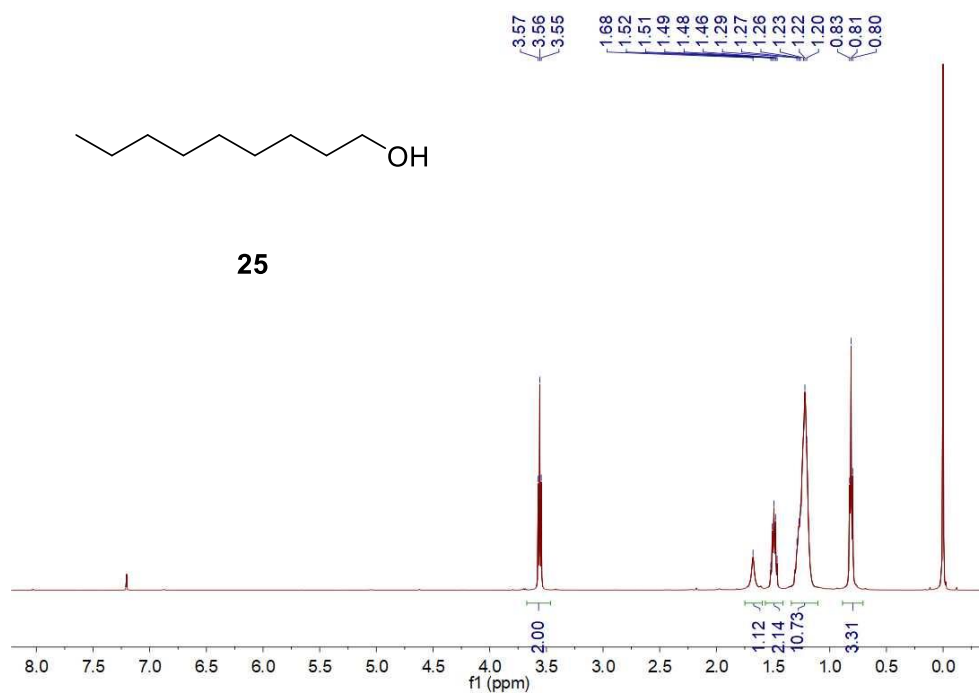

**Figure S39.** <sup>1</sup>H NMR (500 MHz, CDCl<sub>3</sub>) spectrum of **25**.

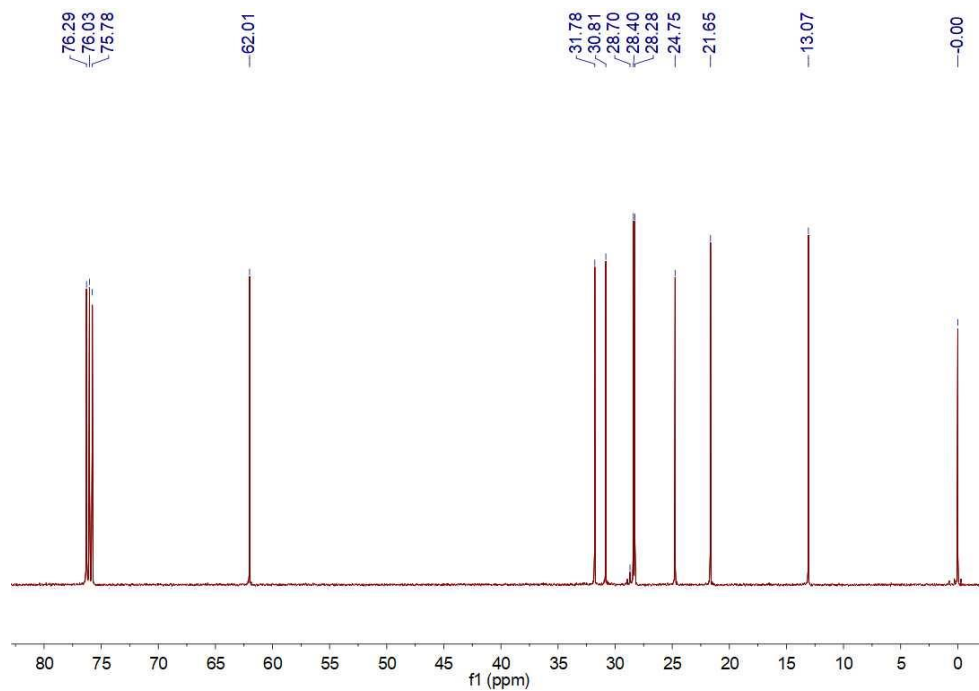

**Figure S40.** <sup>13</sup>C NMR (126 MHz, CDCl<sub>3</sub>) spectrum of **25**.

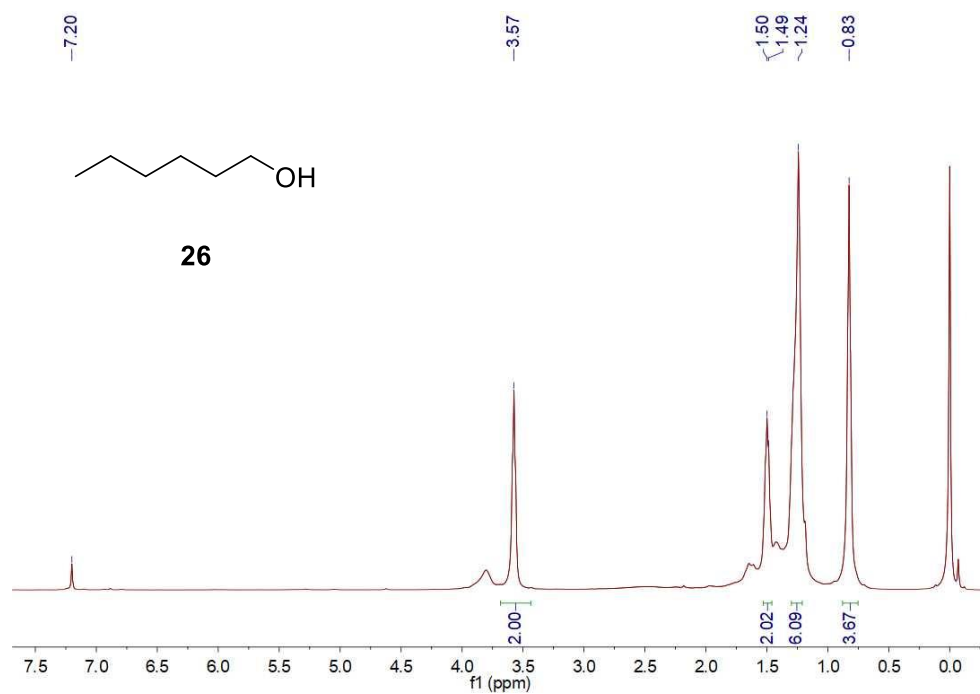

**Figure S41.** <sup>1</sup>H NMR (500 MHz, CDCl<sub>3</sub>) spectrum of **26**.

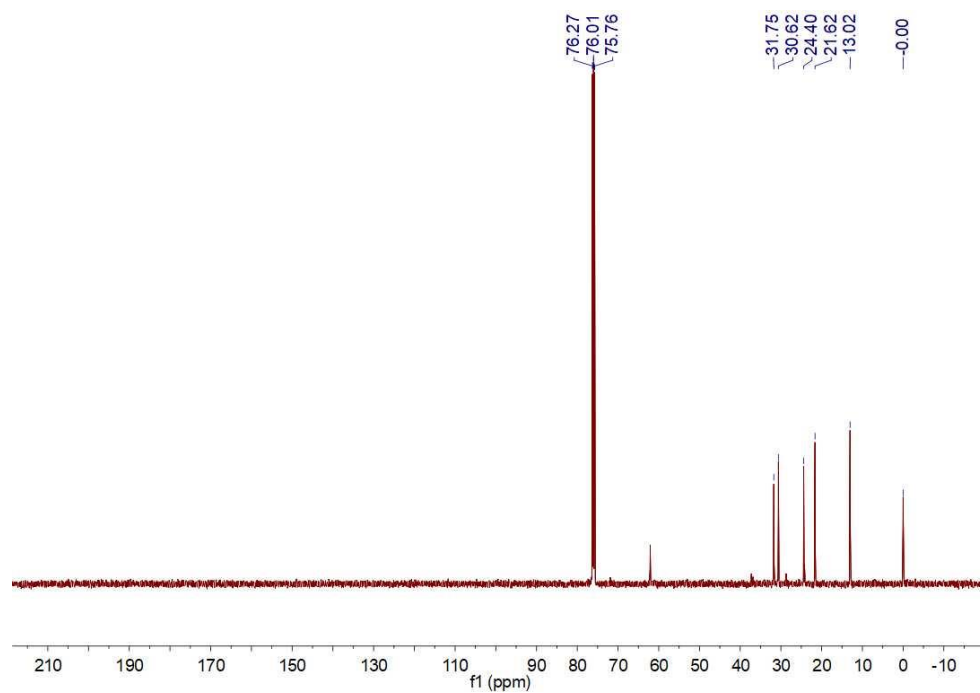

**Figure S42.** <sup>13</sup>C NMR (126 MHz, CDCl<sub>3</sub>) spectrum of **26**.

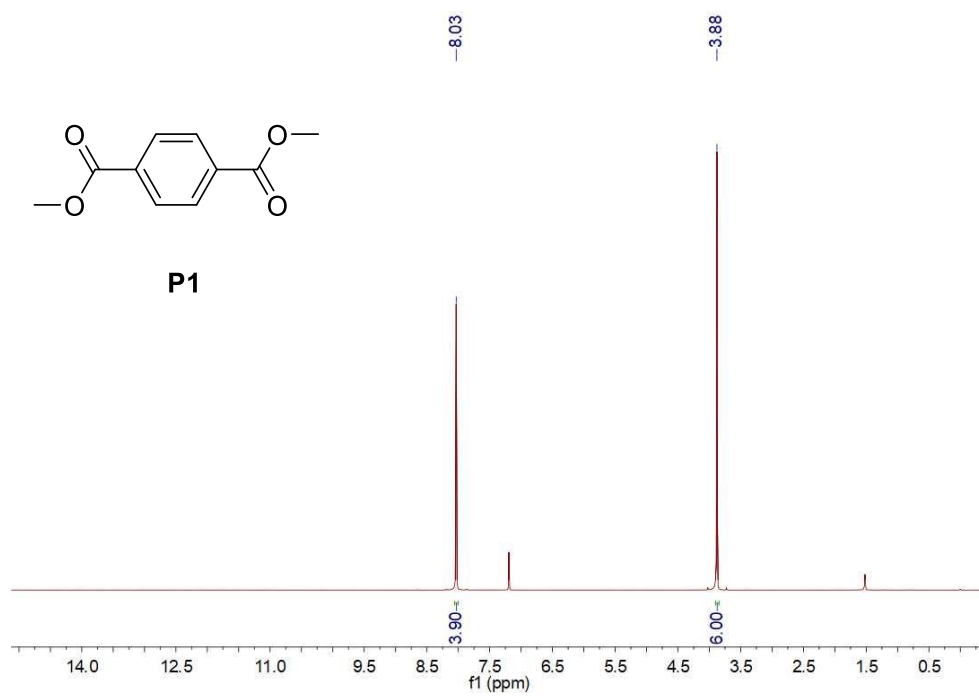

**Figure S43.**  $^1\text{H}$  NMR (500 MHz,  $\text{CDCl}_3$ ) spectrum of **P1**.

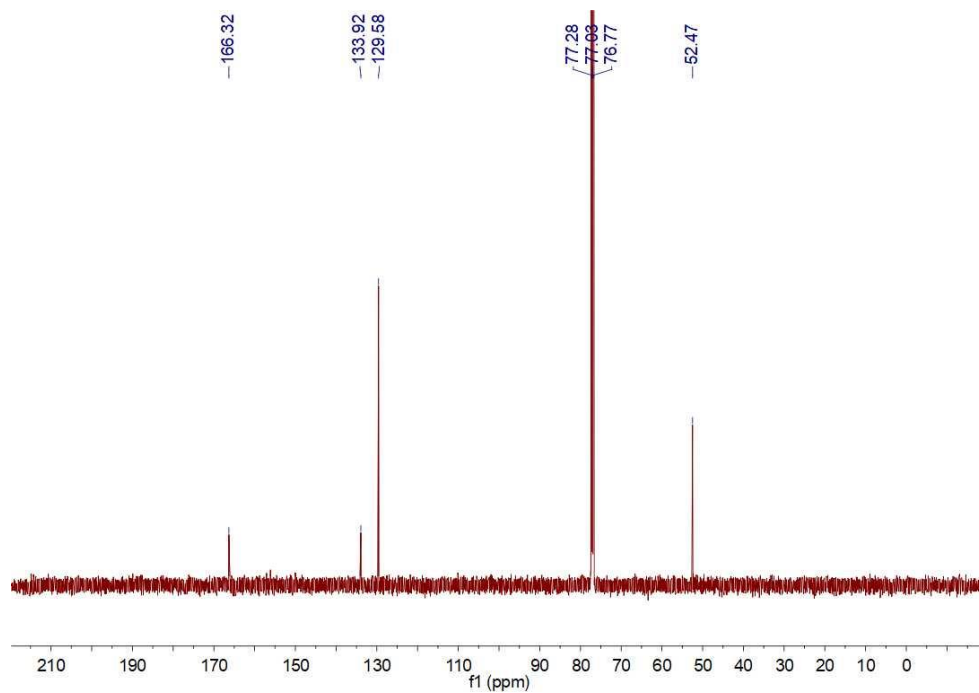

**Figure S44.**  $^{13}\text{C}$  NMR (126 MHz,  $\text{CDCl}_3$ ) spectrum of **P1**.

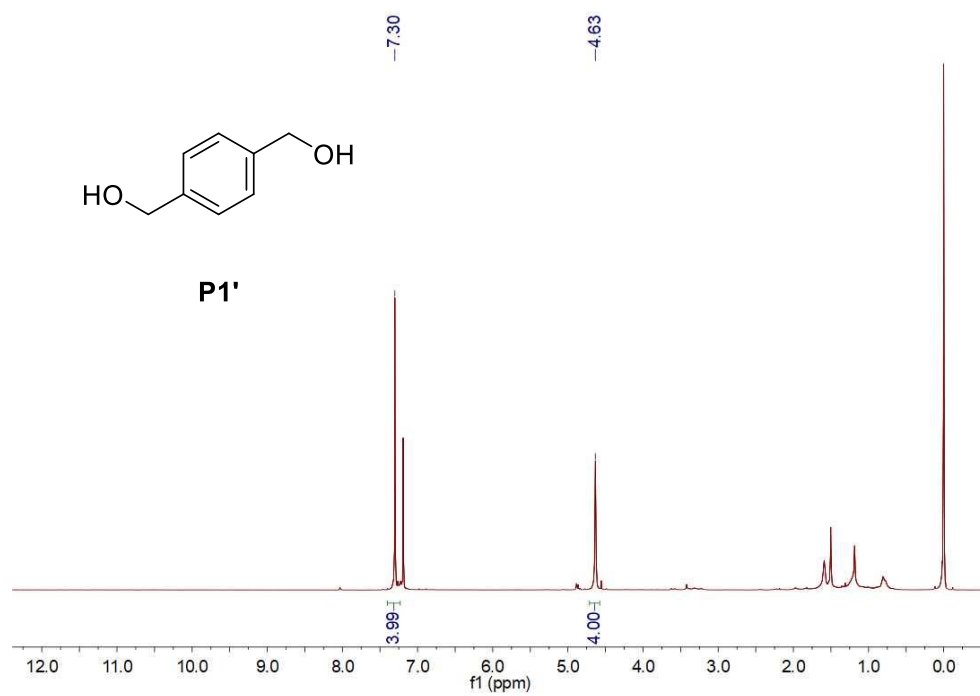

**Figure S45.**  $^1\text{H}$  NMR (500 MHz,  $\text{CDCl}_3$ ) spectrum of **P1'**.

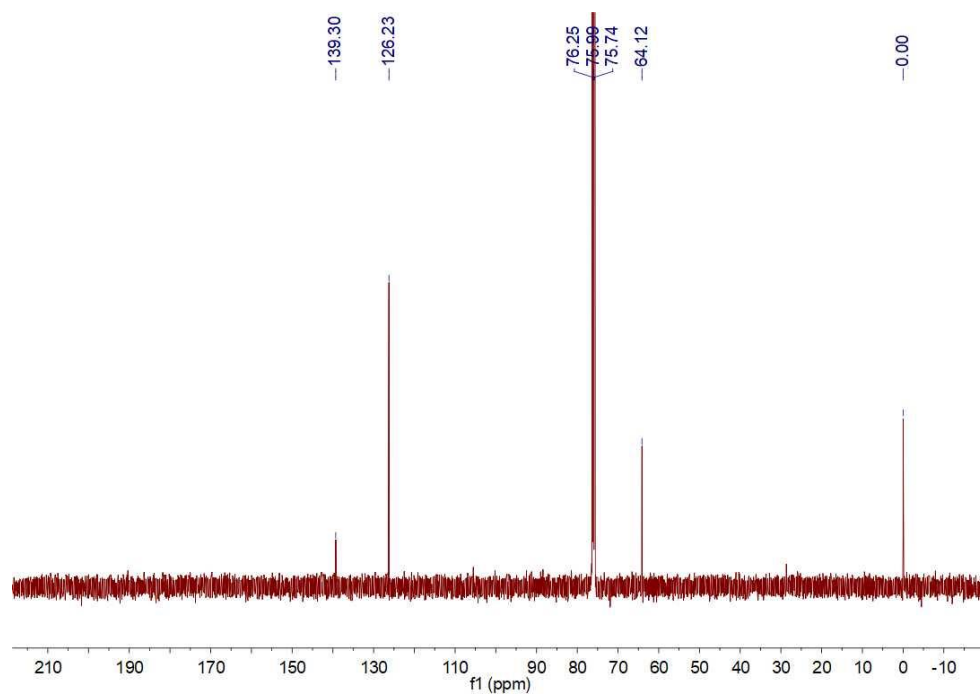

**Figure S46.**  $^{13}\text{C}$  NMR (126 MHz,  $\text{CDCl}_3$ ) spectrum of **P1'**.

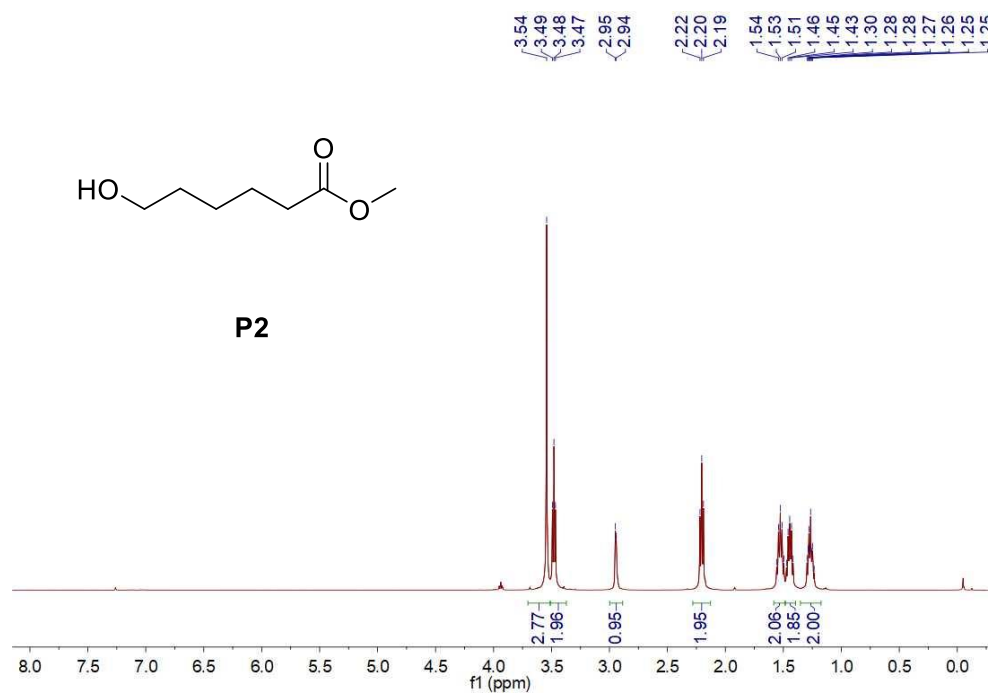

**Figure S47.** <sup>1</sup>H NMR (500 MHz, CDCl<sub>3</sub>) spectrum of **P2**.

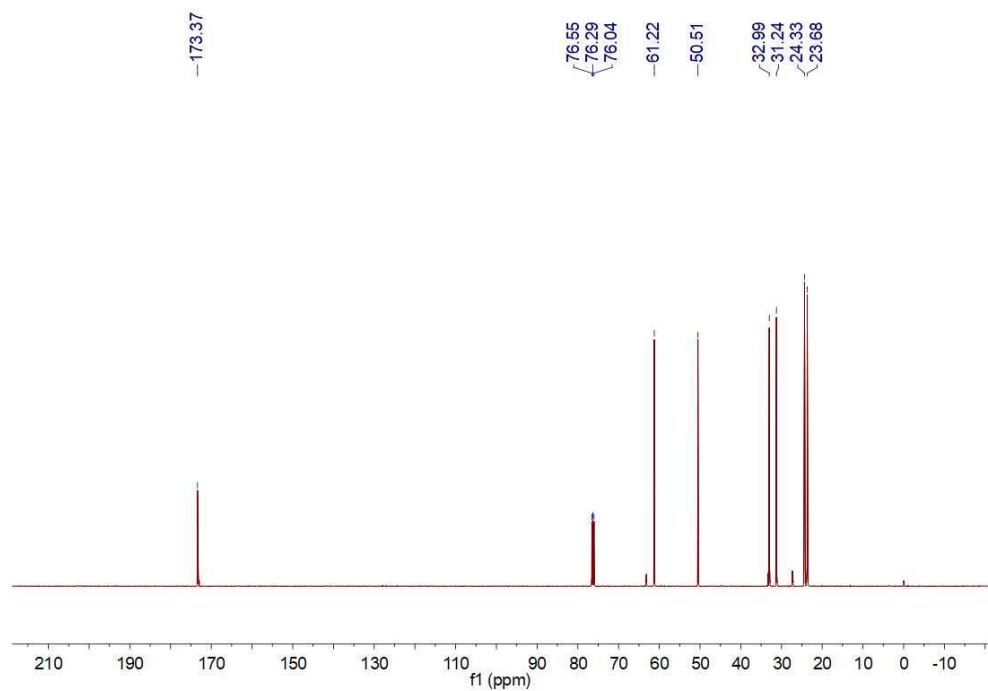

**Figure S48.** <sup>13</sup>C NMR (126 MHz, CDCl<sub>3</sub>) spectrum of **P2**.



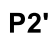

<sup>13</sup>C NMR spectrum of compound 10a in CDCl<sub>3</sub>. The x-axis is labeled 'f1 (ppm)' and ranges from -10 to 210. The spectrum shows several sharp peaks. A triplet for the solvent CDCl<sub>3</sub> is centered at 76.03 ppm, with peaks labeled at 76.28, 76.03, and 75.77 ppm. Other peaks are labeled at 61.76, 31.61, and 24.49 ppm. A small peak is visible at 0 ppm.

S33

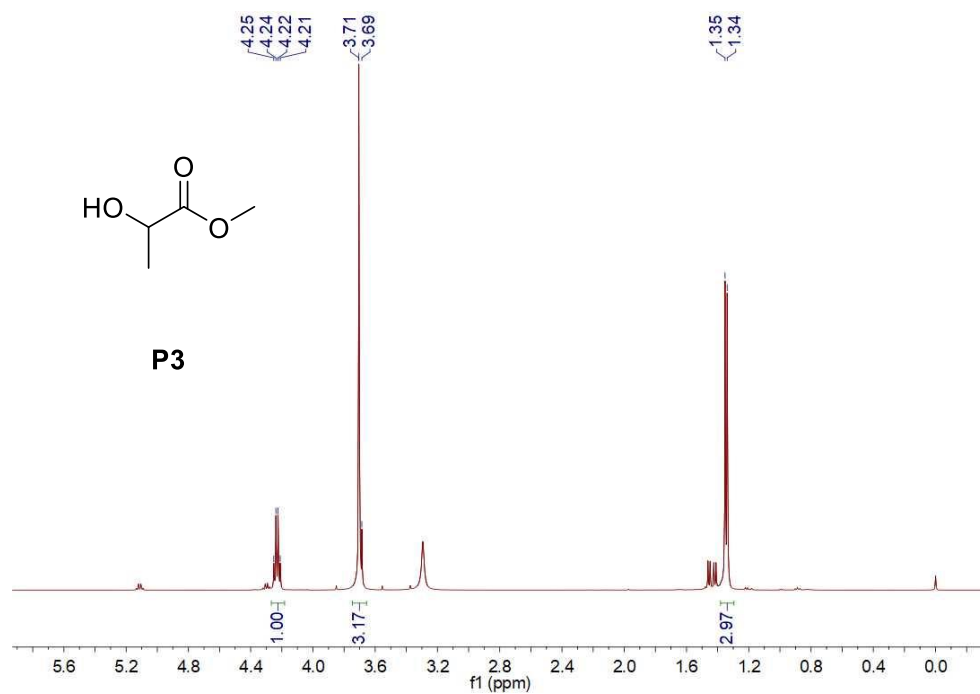

**Figure S51.** <sup>1</sup>H NMR (500 MHz, CDCl<sub>3</sub>) spectrum of **P3**.

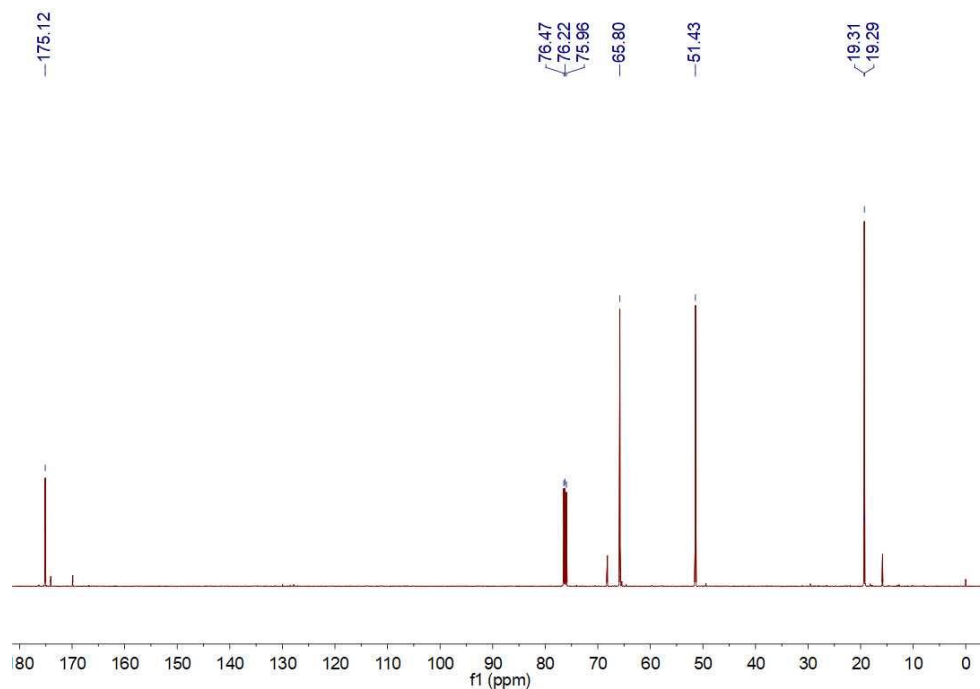

**Figure S52.** <sup>13</sup>C NMR (126 MHz, CDCl<sub>3</sub>) spectrum of **P3**.

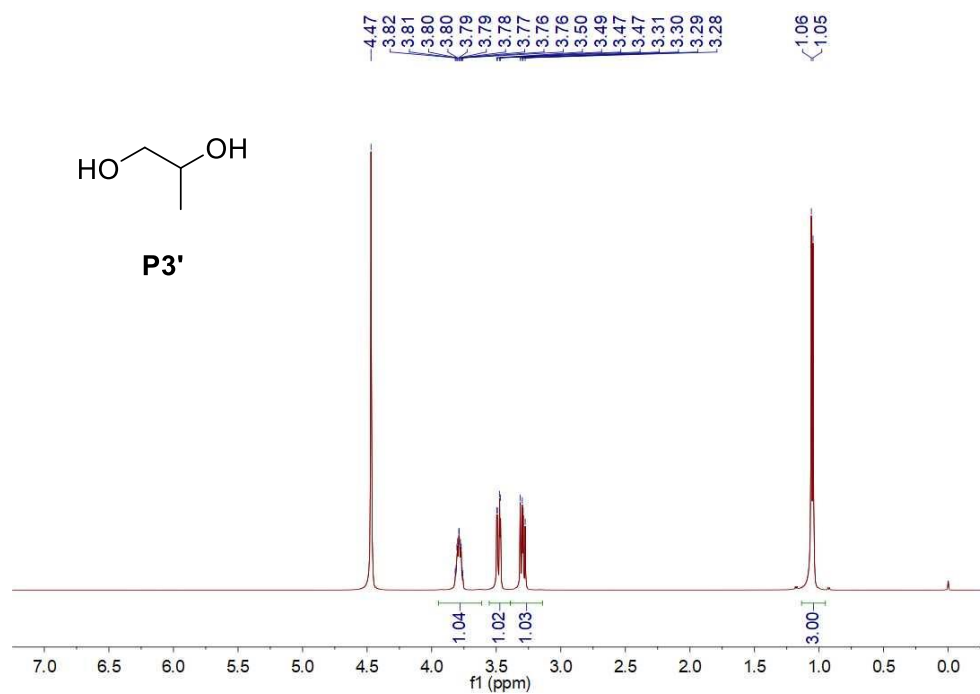

**Figure S53.** <sup>1</sup>H NMR (500 MHz, CDCl<sub>3</sub>) spectrum of **P3'**.

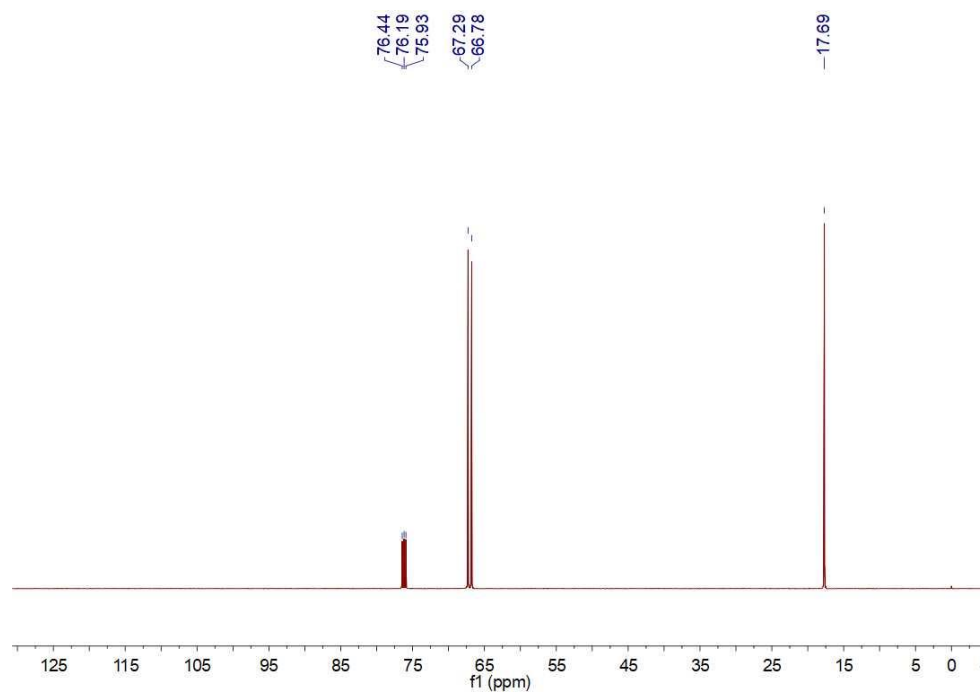

**Figure S54.** <sup>13</sup>C NMR (126 MHz, CDCl<sub>3</sub>) spectrum of **P3'**.

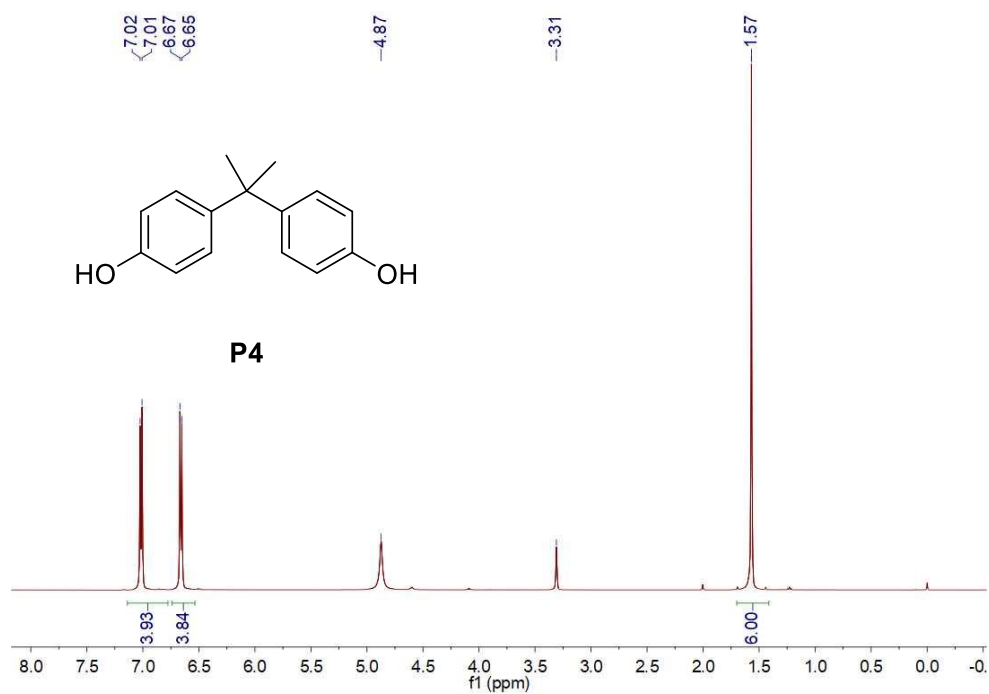

**Figure S55.** <sup>1</sup>H NMR (500 MHz, MeOD) spectrum of **P4**.

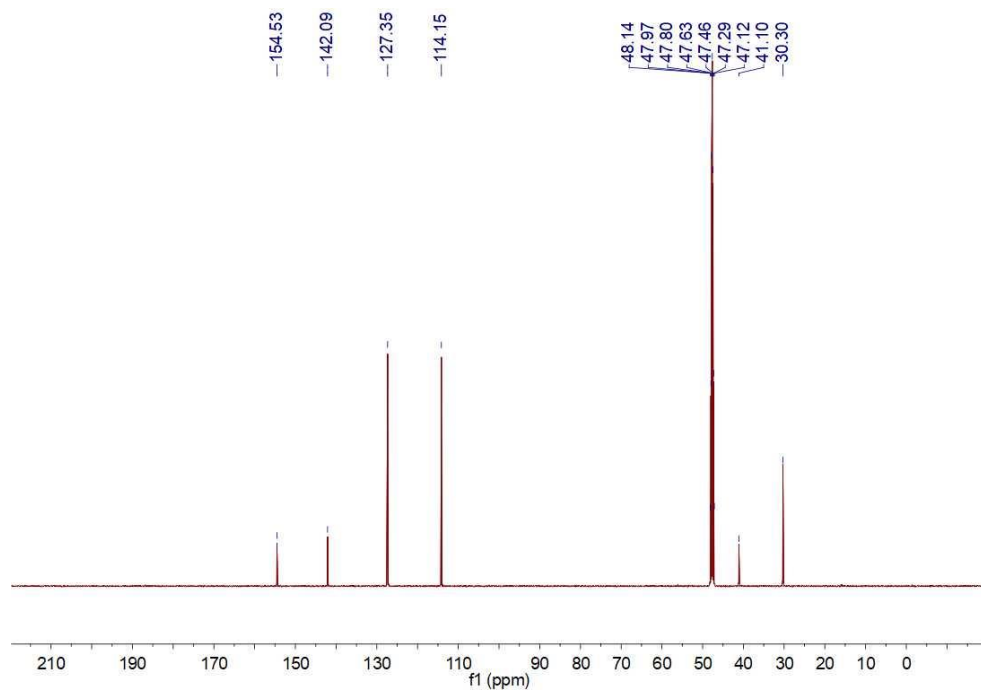

**Figure S56.** <sup>13</sup>C NMR (126 MHz, MeOD) spectrum of **P4**.

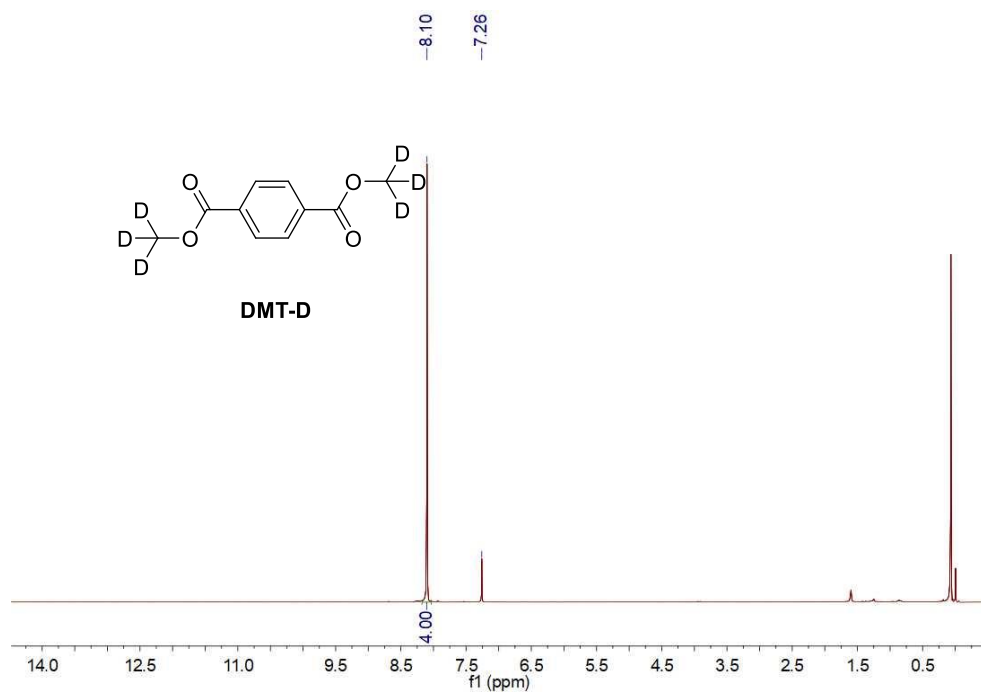

**Figure S57.**  $^1\text{H}$  NMR (500 MHz,  $\text{CDCl}_3$ ) spectrum of **DMT-D**.

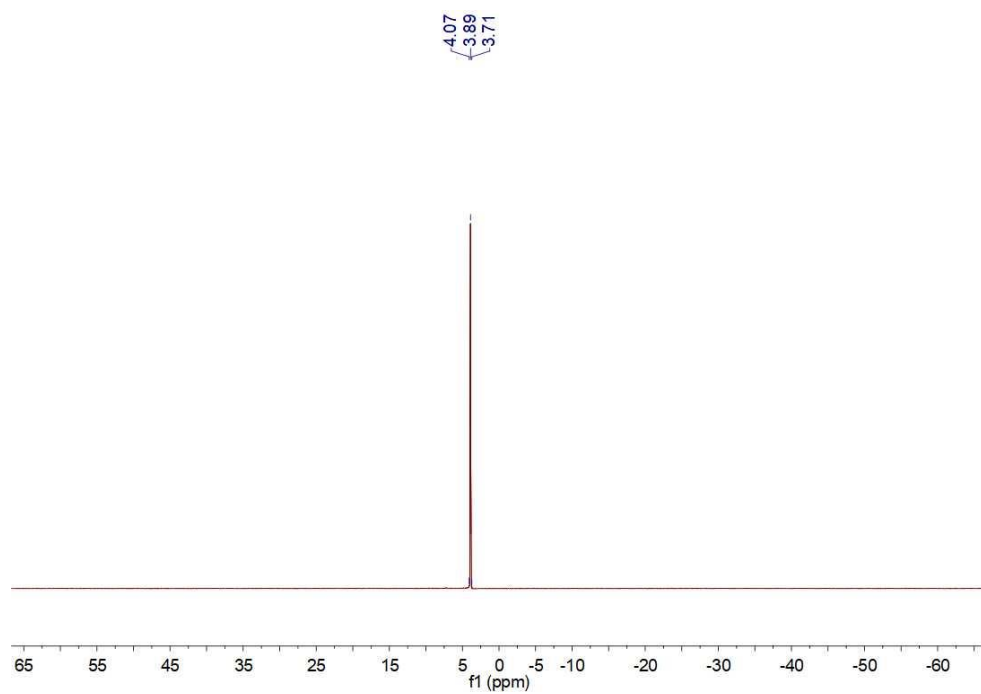

**Figure S58.**  $^2\text{H}$  NMR (61 MHz,  $\text{CDCl}_3$ ) spectrum of **DMT-D**.

**Table S1.** Crystal data and structure refinement.

|                                             |                                                                                 |
|---------------------------------------------|---------------------------------------------------------------------------------|
| Empirical formula                           | C <sub>39</sub> H <sub>44</sub> Cl <sub>11</sub> Fe <sub>3</sub> N <sub>9</sub> |
| Formula weight                              | 1190.32                                                                         |
| Temperature/K                               | 298.15                                                                          |
| Crystal system                              | monoclinic                                                                      |
| Space group                                 | C2/c                                                                            |
| a/Å                                         | 41.6176(10)                                                                     |
| b/Å                                         | 10.7884(2)                                                                      |
| c/Å                                         | 22.8010(6)                                                                      |
| $\alpha$ /°                                 | 90                                                                              |
| $\beta$ /°                                  | 99.547(2)                                                                       |
| $\gamma$ /°                                 | 90                                                                              |
| Volume/Å <sup>3</sup>                       | 10095.6(4)                                                                      |
| Z                                           | 8                                                                               |
| $\rho_{\text{calc}}$ /cm <sup>3</sup>       | 1.566                                                                           |
| $\mu$ /mm <sup>-1</sup>                     | 12.496                                                                          |
| F(000)                                      | 4824.0                                                                          |
| Crystal size/mm <sup>3</sup>                | 0.2 × 0.2 × 0.1                                                                 |
| Radiation                                   | CuK $\alpha$ ( $\lambda$ = 1.54184)                                             |
| 2 $\theta$ range for data collection/°      | 7.864 to 153.09                                                                 |
| Index ranges                                | -48 ≤ h ≤ 52, -10 ≤ k ≤ 13, -28 ≤ l ≤ 28                                        |
| Reflections collected                       | 34334                                                                           |
| Independent reflections                     | 10116 [ $R_{\text{int}}$ = 0.0488, $R_{\text{sigma}}$ = 0.0457]                 |
| Data/restraints/parameters                  | 10116/350/636                                                                   |
| Goodness-of-fit on F <sup>2</sup>           | 1.039                                                                           |
| Final R indexes [ $ I  \geq 2\sigma(I)$ ]   | $R_1$ = 0.0696, $wR_2$ = 0.1993                                                 |
| Final R indexes [all data]                  | $R_1$ = 0.1061, $wR_2$ = 0.2304                                                 |
| Largest diff. peak/hole / e Å <sup>-3</sup> | 0.82/-0.81                                                                      |
